1 Exploratory noise governs both flexibility and spontaneous errors  
2 and is regulated by cocaine  
3  
4  
5  
6

7 **Short title:** A common cause of flexibility and spontaneous errors  
8  
9

10 R. Becket Ebitz<sup>1\*</sup>, Brianna J. Sleezer<sup>2</sup>,  
11 Hank P. Jedema<sup>3</sup>, Charles W. Bradberry<sup>3</sup>, and Benjamin Y. Hayden<sup>1</sup>  
12

13 <sup>1</sup>Department of Neuroscience and Center for Magnetic Resonance Research,  
14 University of Minnesota, Minneapolis, MN, 55455, USA  
15

16 <sup>2</sup>Department of Neurobiology and Behavior, Cornell University, Ithaca, NY, 14853, USA  
17

18 <sup>3</sup>Intramural Program, National Institute on Drug Abuse, Baltimore, MD, 21224, USA  
19  
20

21 \*Corresponding author and lead contact:

22 Becket Ebitz  
23 Department of Neuroscience  
24 University of Minnesota  
25 Minneapolis MN 55455  
26 Phone: (814) 574-7801  
27 Email address: [rebitz@gmail.com](mailto:rebitz@gmail.com)  
28  
29

30  
31  
32  
33  
34  
35  
36  
37  
38  
39  
40  
41  
42  
43  
44  
45

## SUMMARY

In many cognitive processes, lapses (spontaneous errors) are attributed to nuisance processes like sensorimotor noise or disengagement. However, some lapses could also be caused by exploratory noise: behavioral randomness that facilitates learning in changing environments. If so, strategic processes would need only up-regulate (rather than generate) exploration to adapt to a changing environment. This view predicts that lapse rates should be correlated with flexibility because they share a common cause. We report that when macaques performed a set-shifting task, lapse rates were negatively correlated with perseverative error frequency. Furthermore, chronic exposure to cocaine, which impairs cognitive flexibility, increased perseverative errors, but, surprisingly, improved overall performance by reducing lapse rates. We reconcile these results with a model in which cocaine decreased exploration by deepening attractor basins corresponding to rules. These results support the idea that exploratory noise contributes to lapses, meaning that it affects rule-based decision-making even when it has no strategic value.

## INTRODUCTION

Decision-makers can implement arbitrary rules (i.e. stimulus-response mappings) and flexibly change them when contingencies change (Miller and Cohen, 2001; Wallis et al., 2001). Yet even sophisticated decision-makers occasionally fail to implement well-learned rules. Why do these lapses occur? In general, lapses of rule adherence, are tacitly dismissed as the result of ancillary nuisance processes, such as memory deficits, sensorimotor noise, or disengagement (McVay and Kane, 2009; Reason, 1990; Van der Linden et al., 2003; Weissman et al., 2006). An alternative view is that some lapses occur because of the same adaptive processes that allow rule learning and cognitive flexibility in a changing environment. Determining whether lapse rates are somehow linked to the capacity for flexibility could provide insight into psychiatric illnesses in which lapse rates are abnormal (e.g. (Ciesielski and Harris, 1997; Floresco et al., 2009; Heinrichs and Zakzanis, 1998)), and into the basic mechanisms of rule use.

In changing environments, decision-makers mostly exploit valuable strategies, but they also occasionally explore, i.e. deviate from valuable strategies to sample alternatives (Berg and Brown, 1972; Ebitz et al., 2018; Kaelbling et al., 1996; Pearson et al., 2009; Sutton and Barto, 1998; Wilson et al., 2014). In many algorithms for exploration, the likelihood of exploration depends on uncertainty or the value of exploring (Daw et al., 2006; Kaelbling et al., 1996; Sutton and Barto, 1998). In these *phasic* algorithms, exploration occurs most often when reducing perseveration has the greatest benefit. In *tonic* algorithms, conversely, the decision does not depend on uncertainty or the value of exploration (Kaelbling et al., 1996; Sutton and Barto, 1998). Although tonic exploration may appear suboptimal, it eliminates the need to calculate the value of exploration at every time step, is robust to errors in calculating the value of exploration, and it can perform nearly as well as phasic exploration in many circumstances (Dayan and Daw, 2008; Ebitz et al., 2018; Sutton and Barto, 1998). Tonic exploration also has costs: when the environment is stable it produces errors of rule adherence that have no immediate strategic benefit. That is, it produces lapses.

It remains unclear whether exploration occurs even when it has no strategic value. One way to address this question is by looking at behavior in a “change-point” task (Behrens et al., 2007; Nassar et al., 2012; O’Reilly et al., 2013; Wilson et al., 2010). Change-point tasks have stable periods—in which there is no uncertainty and exploratory noise has no strategic benefit—and also rapid changes in reward contingencies that require adaptation and learning. If exploration occurs tonically—if it does contribute to lapses—then spontaneous lapses during stable periods should be related to the ability to discard a rule. That is, across animals and days, lapse rates should be negatively correlated with perseverative errors. An alternative hypothesis is that exploration is phasic, generated only at change points. If so, then lapse rates would not be correlated with perseverative errors (because they are caused by different processes), or perhaps positively correlated (because they are both errors).

Furthermore, if lapse rates and adaptation at change points are both caused by tonic exploration, then it should be possible to identify an intervention that simultaneously alters both behaviors because it regulates this underlying common cause. One candidate intervention is chronic cocaine exposure, which reduces cognitive flexibility (Bechara, 2005; Everitt and Robbins, 2005; Jentsch et al., 2002; Lucantonio et al., 2012; Robbins and Everitt, 1999). Cocaine abusers make more perseverative errors in classic set-shifting tasks such as the Wisconsin Card Sort Task (WCST; (Beatty et al., 1995; Colzato et al., 2009; van der Plas et al., 2009; Woicik et al., 2011)). Both rodents and monkeys exposed to cocaine show deficits in reversal learning

92 (Porter et al., 2011; Schoenbaum et al., 2004) and fail to change behavior in the face of aversive  
93 outcomes (Vanderschuren and Everitt, 2004). This inflexibility may contribute to the cycle of  
94 abuse in cocaine users (Everitt and Robbins, 2005; Robbins and Everitt, 1999; Turner et al.,  
95 2009).

96 If cocaine exposure regulates tonic exploration, then it should not only cause  
97 perseverative errors, but also decrease lapse rates. It should simultaneously decrease flexibility  
98 yet improve performance in set-shifting tasks. Indeed, at least one observational study reported  
99 that human cocaine abusers performed better in the WCST, compared to controls (Hoff et al.,  
100 1996). However, it remains unclear whether chronic cocaine is sufficient to simultaneously  
101 reduce lapse rates and increase perseverative errors. Addressing this question has the potential to  
102 reconcile seemingly paradoxical results in the cocaine literature, and, at the same time, to address  
103 a fundamental question about whether lapses are caused by the same tonic exploration process  
104 that facilitates adaptation and learning.

105 Therefore, we examined behavior of rhesus macaques performing the cognitive set  
106 shifting task (CSST) (Moore et al., 2005; Sleezer and Hayden, 2016; Sleezer et al., 2016, 2017;  
107 Yoo et al., 2018), a primate analogue of the WCST, both before and after exposure to cocaine.  
108 This task is ideal to address the present question because it combines a change point task with a  
109 rule-based decision-making task. Consistent with tonic exploration, we found evidence of a  
110 common cause of lapse rates during stable periods and flexibility following change points.  
111 Moreover, cocaine not only reduced flexibility, but simultaneously and proportionally decreased  
112 lapse rates, suggesting that cocaine regulates tonic exploration. Finally, we fit a model to the  
113 dynamics of behavior, in which cocaine decreased exploration via deepening the attractor basins  
114 that correspond to rule states. Together these results suggest that exploration occurs tonically and  
115 may be well-described as variation in the depth of attractor basins corresponding to rule states.  
116

## RESULTS

Two macaques performed 147 sessions of a primate analogue of the WCST (the CSST (Moore et al., 2005; Sleezer and Hayden, 2016; Sleezer et al., 2016, 2017; Yoo et al., 2018); **Figure 1A**) before and after chronic self-administration of cocaine (n = 89 baseline sessions before cocaine administration, monkey B: n = 62, monkey C: n = 27; n = 58 post-cocaine sessions after, monkey B: 33, monkey C: 25). In a trial, monkeys were sequentially offered three choice options that differed in both color and shape (drawn from nine possible combinations of three colors and three shapes). On each trial, one of the six stimulus features was associated with reward. The rewarded rule was chosen randomly and remained fixed until a rule change was triggered (by successful completion of 15 trials). Rule changes were not cued. We have not previously examined this data in the way presented below nor have we previously reported the results of cocaine exposure.

Monkeys chose the most rewarding option frequently (81.4% of trials  $\pm$  6.5% STD across sessions, monkey B = 83.9%  $\pm$  5.8% STD, monkey C = 77.1%  $\pm$  5.7% STD; average of 576 trials per session, 470 rewarded) and adapted quickly to rule changes (**Figure 1B**). Most errors were perseverative (repeated either the color or shape of the previous option;  $64 \pm 8.5\%$  STD across sessions; average of ). Pre-cocaine sessions were collected after 3 months of training. We observed no measurable trend in performance across the pre-cocaine sessions (**Figure 2A**; percent correct, GLM with terms for main effects of monkey and session number, session number beta = 0.0002, p = 0.6, df = 86, n = 89). Thus, performance had reached stable levels before data collection began.

### Relationship between lapse rates and perseverative errors

Lapses are a failure to adhere to a good policy when the environment has not changed. Perseverative errors are the continued adherence to a bad policy when the environment has changed. These two behaviors could be related (or unrelated) for a variety of reasons.

We considered three hypotheses, each of which predicted a different relationship between lapses during stable periods and perseverative errors after change points. *First*, if spontaneous errors of rule adherence (lapses) are caused by the same process that helps to discard a rule when it is no longer rewarded (e.g. tonic exploratory noise) then lapse rates would be negatively correlated with perseverative errors across sessions (**Figure 2B**). *Second*, if lapses and perseverative errors are regulated by different processes (e.g. if lapses occur because of a transient memory deficit, while perseverative errors occur because of a failure of inhibitory control), then the frequency of lapses and perseverative errors would not be correlated (**Figure 2C**). *Third*, if some nuisance process causes both types of errors (e.g. disengagement or fatigue), then lapses and perseverative errors would be positively correlated (**Figure 2D**).

We compared perseverative errors in the five trials after change points (when learning was maximal; **Figure 1B**) with lapse rates in the ten trials before change points (a non-overlapping subset of trials in which learning had reached asymptote). Lapse rates and perseverative errors were negatively correlated (**Figure 2E**; both monkeys: Pearson's  $r = -0.52$ ,  $p < 0.0001$ ,  $n = 89$ ). This was not a trivial consequence of a performance offset between the monkeys: the effect was strongly significant just within the monkey in which we had more baseline data (monkey C: n = 62 sessions,  $r = -0.45$ ,  $p < 0.0002$ ; same sign in monkey B: n = 27 sessions,  $r = -0.26$ ,  $p = 0.25$ ). A negative correlation between lapses and perseverative errors

162 indicates that the rate of lapses in rule adherence is positively correlated with the ability to  
163 discard a rule when it is no longer rewarded.

164 Lapse rates in one epoch cannot directly cause flexibility in another epoch (or vice versa),  
165 so this correlation implies that both behaviors share some common, underlying cause. One  
166 possibility is tonic exploration, which would cause monkeys to occasionally sample an  
167 alternative to the current best option, regardless of change points. Another possibility is a failure  
168 to learn, which would cause lapses (because the rule is never discovered) and reduce  
169 perseverative errors (because a rule that is never discovered is cannot persevere). The failure-to-  
170 learn view predicts that perseverative errors in one block should be best explained by the lapses  
171 in the immediately preceding block. However, the probability of perseverative errors in each  
172 individual block was best explained by the global lapse rate for the session, not to the lapse rate  
173 or the rate of learning in the previous block (**Figure 2F**; see Methods; last-block lapse rate  
174 model: log likelihood = -6063.4, AIC = 12133, BIC = 12152; last-block learning rate model: log  
175 likelihood = -6067.8, AIC = 12142, BIC = 12160; global lapse rate model: log likelihood = -  
176 6044.2, AIC = 12094, BIC = 12113; best model = global lapse rate model, all other AIC and BIC  
177 weights < 0.0001). Thus, the negative correlation between lapse rates and perseverative errors  
178 was not due to a failure to learn in some blocks, but instead to some global common cause, such  
179 as tonic exploration.

180 In this task, the outcome of the previous trial provides perfect information about whether  
181 or not that choice was correct. If monkeys were rewarded on the last trial, then either the color or  
182 shape of the last choice matched the rewarded rule and the best response is to repeat either the  
183 color or shape or both in the next trial. Conversely, if the monkeys were not rewarded, then  
184 neither the color or shape of the last choice was consistent with the rewarded rule and the best  
185 response is to choose a novel option—one that matches neither the color nor the shape of the  
186 previous choice. However, tonic exploration would sometimes cause monkeys to choose novel  
187 options following reward delivery—when it is clearly incorrect to do so. Indeed, the monkeys  
188 did choose novel options after both reward delivery (monkey B: 15.8% novel choices, monkey  
189 C: 9.6%) and omission (monkey B: 31.6% novel choices, monkey C: 25.2%). However, tonic  
190 exploration not only predicts that these choices should occur, but that their frequency should be  
191 governed by a common underlying process. That is, the frequency of novel choices after reward  
192 delivery should be correlated with the frequency of novel choices after reward omission. Indeed,  
193 these choices were strongly correlated (**Figure 2G**; Pearson's  $r = 0.72$ ,  $p < 0.0001$ ,  $n = 89$ ). This  
194 was individually significant within the animal in which we had more baseline sessions (monkey  
195 C:  $n = 62$  sessions,  $r = 0.68$ ,  $p < 0.0001$ ; monkey B:  $n = 27$  sessions,  $r = -0.04$ ,  $p = 0.9$ ). Thus, the  
196 monkeys' decisions to deviate from choice history—to try something new—also co-varied,  
197 regardless of whether or not that was correct, consistent with a common cause.

198

### 199 **Cocaine self-administration**

200 The variability in the baseline behavior suggested a common process regulating the  
201 decision to deviate from a rule, regardless of whether or not it is correct to do so. If this is true,  
202 then it should be possible to co-regulate lapses and perseverative errors by regulating this  
203 process. Therefore, we next allowed both monkeys to self-administer cocaine—exposure to  
204 which is known to affect the ability to adapt to a changing environment (Bechara, 2005; Everitt  
205 and Robbins, 2005; Jentsch et al., 2002; Lucantonio et al., 2012; Porter et al., 2011; Robbins and  
206 Everitt, 1999).

207 Monkeys self-administered cocaine through an implanted venous port (see Methods).  
208 Briefly, for 3 hours each day, 5 days a week, over a total of 6 to 7 weeks (monkey B: 50 days,  
209 monkey C: 42 days), monkeys were placed in front of a touch screen display and pressed a  
210 centrally located cue a set number of times (see Methods), which resulted in cocaine infusion.  
211 Monkeys initially underwent self-administration training (10 days). During this time, the  
212 cumulative dose of cocaine self-administered per day increased from 0.8 mg/kg to 4 mg/kg at 3  
213 responses/reward (FR3), followed by a ramp-up period to 30 responses/reward (FR30; 7 days at  
214 4 mg/kg), after which we began examining behavioral data during chronic cocaine exposure. We  
215 collected behavior in the morning, while monkeys self-administered cocaine in the afternoon in a  
216 separate session (with a minimum of 1 hour of home cage time in between). This experimental  
217 design allowed us to determine the long-term effects of chronic cocaine self-administration  
218 without the drug “on board” at the time of testing. Over all self-administration sessions, monkey  
219 B administered a cumulative total of 179.9 mg/kg of cocaine, while monkey C administered  
220 153.2 mg/kg cocaine.

221

### 222 **Effects of cocaine on behavior**

223 Because chronic cocaine exposure is associated with decreased flexibility and increased  
224 perseveration, we first asked whether cocaine administration changed the proportion of  
225 perseverative errors. It did (**Figure 3A**; fraction of all errors that were perseverative, post cocaine  
226 compared to pre, t-test:  $p < 0.0001$ ,  $t(145) = 6.13$ , mean increase in fraction perseverative errors  
227 = 7.7%, 95% CI = 5.1% to 10.0%; monkey B:  $p < 0.0001$ ,  $t(58) = 7.70$ ; monkey C:  $p < 0.0001$ ,  
228  $t(85) = 6.99$ ). One concern in any study of chronic drug use is that practice alone could change  
229 behavior and appear to be a drug effect. To test for this possibility, we developed a generalized  
230 linear model (GLM) to differentiate between the effects of drugs and practice (see Methods).  
231 There was no effect of practice on perseverative errors ( $\beta_2 = 0.003$ ,  $p = 0.7$ ) and including a term  
232 for session number did not change the magnitude of the effect of cocaine ( $\beta_1 = 0.097$ ,  $p <$   
233  $0.0001$ ), indicating that practice explained little, if any, change in perseverative errors in post-  
234 cocaine sessions.

235 If cocaine increased perseveration by decreasing tonic exploration, then it might also  
236 improve overall performance in this set-shifting task by reducing lapse rates. Cocaine reduced  
237 whole-session error rates (**Figure 3B**; percent correct, post cocaine compared to pre, t-test:  $p <$   
238  $0.001$ ,  $t(145) = 3.36$ , mean increase = 3.6%, 95% CI = 1.5% to 5.7%; monkey B:  $p < 0.0001$ ,  
239  $t(58) = 6.30$ ; monkey C:  $p < 0.002$ ,  $t(85) = 3.22$ ). Again, session number did not affect accuracy  
240 ( $\beta_2 = 0.001$ ,  $p = 0.9$ ) and accounting for session number only increased the apparent magnitude  
241 of the effect of cocaine (compare 3.6% change to  $\beta_1 = 0.054$ ,  $p < 0.0005$ ). This was likely driven  
242 by the substantial decrease in the frequency of lapses in the 10 trials before change points (figure  
243 3C; two-sample t-test; monkey B:  $p < 0.0001$ ,  $t(58) = 5.57$ , mean difference = 7.1%, 95% CI =  
244 4.6% to 9.7%; monkey C:  $p < 0.0006$ ,  $t(85) = 3.59$ , mean = 4.0%, 95% CI = 1.8% to 6.2%).

245 The hypothesis that cocaine regulates a common cause of flexibility and lapses makes a  
246 strong prediction: that cocaine should simultaneously shift lapses and perseverative errors along  
247 the axis on which they endogenously co-vary (line in Figure 2E). This is because this axis  
248 reflects the consequences of any common cause on both lapses and perseverative errors.  
249 Therefore, any modulation of this common cause should be constrained to shifts along this  
250 manifold. Therefore, we measured the projection of the pre- and post-cocaine sessions onto the  
251 line along which the two behaviors endogenously co-varied (see Methods). Cocaine significantly  
252 shifted behavior along this axis (two-sample t-test, both monkeys:  $p < 0.0001$ ,  $t(145) = 7.60$ ,

253 mean shift in standardized projection = 0.77, 95% CI = 0.57 to 0.98). The effect was significant  
254 and of comparable magnitude in both monkeys (monkey B:  $p < 0.0002$ ,  $t(58) = 4.09$ , mean =  
255 0.72, 95% CI = 0.37 to 1.07; monkey C:  $p < 0.0001$ ,  $t(85) = 5.48$ , mean = 0.68, 95% CI = 0.44 to  
256 0.93). This is precisely the effect that we would expect if cocaine regulated the underlying cause  
257 of both behaviors.

258 Next, we asked whether cocaine had similar effects on monkeys' decisions to deviate  
259 from their own previous policy. That is, the probability of novel choices (**Figure 2G**). A  
260 decrease in tonic exploration would decrease the likelihood of novel choices regardless of  
261 previous reward outcome, so asked whether chronic cocaine decreased novel choices following  
262 both reward delivery and omission. Cocaine decreased the probability of novel choices both after  
263 reward omission (when novel choices were the best option, **Figure 3D**; two-sample t-test, both  
264 monkeys,  $p < 0.0001$ ,  $t(145) = 6.16$ , mean change = -5.1%, 95% CI = -3.4 to -6.7%; monkey B:  
265  $p < 0.0001$ ,  $t(58) = 7.99$ ; monkey C:  $p < 0.0001$ ,  $t(85) = 8.57$ ; not due to practice  $\beta_1 = -0.057$ ,  $p <$   
266  $0.0001$ ;  $\beta_2 = -0.008$ ,  $p = 0.1$ ) and after reward delivery (when novel choices were the worst  
267 option, both monkeys,  $p < 0.006$ ,  $t(145) = 2.83$ , mean change = -1.7%, 95% CI = -0.5 to -2.9%;  
268 monkey B:  $p < 0.0001$ ,  $t(58) = 6.97$ ; monkey C:  $p < 0.001$ ,  $t(85) = 3.50$ ; not due to practice  $\beta_1 = -$   
269  $0.024$ ,  $p < 0.002$ ;  $\beta_2 = -0.005$ ,  $p = 0.2$ ). It is important to note that if cocaine decreased learning  
270 (i.e. the effect of reward on behavior), then it would decrease the difference between choices  
271 following reward delivery and reward omission (**Figure 3E**). However, cocaine instead  
272 decreased the probability of novel choices, regardless of reward outcome, consistent with tonic  
273 exploration (**Figure 3F**).

274 If these effects are due to cocaine's effects on tonic exploration, then cocaine should  
275 simultaneously alter the probability of novel choices regardless of previous outcome. That is,  
276 cocaine should shift novel choice probability along the axis of endogenous co-variability  
277 between rewarded and non-rewarded trials (line in Figure 2G). It did so (Figure 3D: two-sample  
278 t-test, both monkeys,  $p < 0.0001$ ,  $t(145) = 5.78$ , mean change = 0.49, 95% CI = 0.32 to 0.66;  
279 monkey B:  $p < 0.09$ ,  $t(58) = 1.73$ ; monkey C:  $p < 0.0001$ ,  $t(85) = 7.85$ ). Thus, cocaine appeared  
280 to regulate the probability of making novel choices directly, rather than modulating the effect of  
281 rewards on novel choices. Because tonic exploration would produce novel choices both when  
282 they are useful and when they are not, this result is consistent with the idea that chronic cocaine  
283 down-regulates tonic exploration.

284

### 285 **Hidden Markov model**

286 We previously developed a method to identify whether individual choices are exploratory  
287 or exploitative based on a hidden Markov model (HMM) (Ebitz et al., 2018). Here, we extend  
288 this model to dissociate exploratory choices from choices that were made while using rules  
289 (**Figure 4A**). We chose this framework for two reasons. First, because HMMs are useful for  
290 inferring the latent "states" that underlie a sequence of observations (such as the explore and rule  
291 goal states that underlie the sequences of choices here). Second, because HMMs describe  
292 behavior in terms of the dynamics of these underlying states, which allowed us to analyze how  
293 cocaine changed the dynamics of explore and rule goal states.

294 We reasoned that rule-states would only generate choices that matched the rule, but while  
295 exploring monkeys would choose many different kinds of choices. Therefore, we next asked  
296 whether there was evidence of these different dynamics in behavior. Indeed, there were distinct  
297 dynamics associated with repeated choices within a feature dimension (i.e. following a rule) and  
298 rapid samples across feature dimensions (i.e. exploring; **Figure S1**). These rapid samples



299 occurred more frequently than expected, suggesting a distinct exploratory state (**Figure S2**). We  
300 also found that the duration of choice runs depended on reward (**Figure S3**). To account for this,  
301 we extended model so the outcome of the last trial affected the probability of transitioning  
302 between states (“transmissions”, see Methods; (Bengio and Frasconi, 1995)). The final HMM  
303 (see **Methods**) qualitatively reproduced the reward-dependent state durations (**Figure S3**) and  
304 the latent states inferred by this model successfully differentiated choices that occurred due to  
305 each of these dynamics (example in **Figure 4B**). In addition, the latent states inferred by the  
306 model were strongly aligned with the change points in the task, indicating that the model was  
307 most likely to identify choices as exploratory at precisely the time when the monkeys were  
308 actually searching for a new rule (compare **Figure 4C** and **Figure 1B**).

309 Next we asked whether the model was capable of reproducing the major behavioral  
310 effects of cocaine. We fit one model to all the baseline sessions and a second model to the post-  
311 cocaine sessions, then simulated observations from each model. The changes in model  
312 parameters across the baseline and post-cocaine sessions were sufficient to reproduce the major  
313 behavioral results: an increase in both task performance (**Figure 5A**; mean increase in percent  
314 correct = 14.5%, 95% CI = 12.8 to 16.1%,  $p < 0.0001$ ,  $t(145) = 17.70$ ) and perseverative errors  
315 (**Figure 5B**; mean increase in percent perseverative errors = 4.8%, 95% CI = 3.9 to 5.8%,  $p <$   
316  $0.0001$ ,  $t(145) = 9.89$ ). Thus, the model captured the main effects of cocaine on behavior.

317

### 318 **Cocaine reduces HMM-inferred exploration**

319 Next, we asked whether cocaine affected the probability of exploration, as inferred from  
320 the model using a standard algorithm (Viterbi algorithm). One model was fit to each session,  
321 then each choice was labeled by its max a posteriori latent state. The monkeys had different  
322 levels of exploration, but within each monkey, there were fewer explore-state choices in post-  
323 cocaine treatment sessions, compared to baseline sessions (**Figure 5C**; monkey B:  $p < 0.0002$ ,  
324  $t(58) = 4.03$ , mean change = -9.3%, 95% CI = -4.7 to -13.9%; monkey C:  $p < 0.004$ ,  $t(85) = 3.01$ ,  
325 mean = -5.0%, 95% CI = -1.7 to -8.4%; not due to practice:  $\beta_1 = 0.052$ ,  $p < 0.03$ ;  $\beta_2 = 0.011$ ,  $p =$   
326  $0.3$ ). Thus, monkeys explored less often after cocaine delivery, consistent with the idea that  
327 cocaine alters tonic exploration.

328

### 329 **Effects of cocaine on model dynamics**

330 The stationary distribution of a HMM is the equilibrium probability distribution over  
331 states (Murphy, 2012). Here, the HMM’s stationary distribution is the relative occupancy of  
332 explore-states and rule-states that we would expect after infinite realizations, given the outcome  
333 of the last trial (see Methods). That is, it provides a measure of the energetic landscape of the  
334 behavior the model is fit to. If a state has very low potential energy—if its basin of attraction is  
335 deep—then we will be more likely to observe the process in this state, and the stationary  
336 distribution will be shifted towards this state (Ambegaokar, 2017). Therefore, we will refer to the  
337 stationary distribution probability of exploration as the “relative depth” of exploration.

338 As expected, reward delivery reduced the relative depth of explore states (**Figure 5D**;  
339 and increased the relative depth of the rule states; see Methods;  $\beta_1 = -0.49$ ,  $p < 0.0002$ ). Cocaine  
340 also decreased the relative depth of explore states ( $\beta_2 = -0.05$ ,  $p < 0.02$ ). There was a significant  
341 offset between monkeys ( $\beta_4 = -0.05$ ,  $p < 0.0002$ ) and no effect of practice ( $\beta_5 = 0.0003$ ,  $p = 0.4$ )  
342 or interaction between reward and cocaine ( $\beta_3 = 0.016$ ,  $p = 0.4$ ). This suggested that cocaine  
343 uniformly altered the depth of exploration, rather than the effect of reward on exploration. To  
344 test this, we asked whether the effect of cocaine on explore state depth differed after reward

345 delivery, compared to reward omission. There was no significant difference after controlling for  
346 the expected effect of differing baselines (see Methods; paired t-test:  $p = 0.9$ ,  $t(144) = -0.09$ ,  
347 mean change = 1%, 95% CI = -25% to 23%). Moreover, the depth of exploration was correlated  
348 across reward outcome within the baseline sessions (both monkeys:  $r = 0.38$ ,  $p < 0.0001$ ,  $n = 89$ )  
349 and cocaine delivery did not disrupt these correlations (both monkeys: Pearson's  $r = 0.23$ ,  $p <$   
350  $0.005$ ,  $n = 147$ ). Thus, cocaine uniformly decreased the relative depth of exploration, regardless  
351 of reward outcomes.

352

### 353 **Effects of cocaine on model parameters**

354 Did cocaine reduce the relative depth of explore states by increasing the absolute depth of  
355 exploration or by increasing the absolute depth of rule states? To arbitrate between these  
356 interpretations, we next asked how cocaine changed the parameters of the model. The model had  
357 4 parameters (**Figure 5E**), reflecting the probability of staying in each of the two states (explore  
358 and the generic rule state) following the two outcomes (reward delivery and omission). If  
359 cocaine largely affected the probability of staying in exploration, then that would suggest that  
360 cocaine specifically decreased the depth of explore states. This is because the average dwell time  
361 in a state (that is, the inverse of the rate of leaving that state) has a natural relationship to the  
362 energetic depth of that state, relative to the energy barrier between states (Hänggi et al., 1990).  
363 Alternatively, if cocaine largely affected the probability of staying in a rule, then that would  
364 suggest that cocaine specifically increased the depth of rule states. We also considered a third  
365 possibility: that cocaine had different effects following reward delivery and omission—i.e.  
366 decreasing the depth of rules after reward omission, but increasing depth of exploring after  
367 reward delivery. This last effect would be hard to reconcile with the idea of a unified effect on  
368 tonic exploration.

369 Within each monkey, there were significant changes in the same two model parameters in  
370 post-cocaine sessions (**Table 1**). Cocaine increased the probability of staying in rule states  
371 following reward omission (monkey B:  $p < 0.0001$ ,  $t(58) = 5.69$ ; monkey C:  $p < 0.02$ ,  $t(85) =$   
372  $2.57$ ; not due to practice:  $\beta_1 = 0.070$ ,  $p < 0.04$ ,  $\beta_2 = 0.027$ ,  $p = 0.1$ ) and cocaine increased the  
373 probability of staying in rule states following reward delivery (monkey B:  $p < 0.001$ ,  $t(58) =$   
374  $3.45$ ; monkey C:  $p < 0.003$ ,  $t(85) = 3.06$ ; not due to practice:  $\beta_1 = 0.004$ ,  $p < 0.01$ ,  $\beta_2 = 0.0002$ ,  $p$   
375  $= 0.8$ ). Cocaine had no significant effect on the depth of explore states following either reward  
376 omission ( $\beta_1 = -0.004$ ,  $p > 0.9$ ) or reward delivery ( $\beta_1 = 0.03$ ,  $p = 0.7$ ). However, there was a  
377 trend towards a decrease in the depth of explore states with practice in both conditions  
378 (omission:  $\beta_2 = -0.03$ ,  $p = 0.1$ , delivery:  $\beta_2 = -0.06$ ,  $p = 0.09$ ). Thus, the weight of evidence  
379 suggests that cocaine selectively deepened rule states (Figure 5E): it decreased tonic exploration  
380 via increasing the tendency to adhere to a rule, regardless of reward outcomes.

381

382

## DISCUSSION

We found that spontaneous lapses and perseverative errors were not independent observations, but instead were inversely related across monkeys and sessions. This was not a trivial consequence of the monkeys' ability to learn the rewarded rule. Instead, there was a global common cause of both lapses and perseverative errors, which meant that the two types of error inversely co-varied along a one-dimensional manifold. Moreover, chronic cocaine—a perturbation known to decrease flexibility and increase perseveration (Bechara, 2005; Everitt and Robbins, 2005; Jentsch et al., 2002; Lucantonio et al., 2012; Porter et al., 2011; Robbins and Everitt, 1999)—did not uniquely increase perseverative errors, but instead shifted the animals along this manifold. That is, cocaine produced a concomitant decrease in lapse rates. To understand these results, we fit and analyzed a HMM, which revealed that cocaine decreased exploration via deepening attractor basins corresponding to rule states.

These results suggest that the same process that facilitates flexibility in a dynamic environment is responsible for at least some spontaneous lapses in rule adherence when the environment is stable. That is, these results suggest that exploratory noise is tonically present, and causes deviations from established decision policies, both when these deviations are useful and when they are not.

### **Relationship to previous theories of lapses and flexibility**

We are not proposing that tonic exploratory noise is categorically different from other processes that are typically implicated in lapses, such as disengagement, memory deficits, sensorimotor noise, or attentional or executive disengagement (McVay and Kane, 2009; Reason, 1990; Van der Linden et al., 2003; Weissman et al., 2006). Instead, we propose that these may be valid psychological descriptions of the effect that exploratory noise has on behavior.

What, then, is exploratory noise in the brain? Exploratory decisions are associated with sudden disruption in the choice-predictive organization of populations of neurons in the prefrontal cortex (Ebitz et al., 2018). It is possible that this disorganization reflects a disruption of the prefrontal attractor dynamics that are thought to underpin working memory (Brody et al., 2003; Chaudhuri and Fiete, 2016; Compte et al., 2000; Kopec et al., 2015; Wimmer et al., 2014), motor control (Li et al., 2016), decision-making (Machens et al., 2005; Wang, 2002, 2008), and executive control (Ardid and Wang, 2013; Rougier et al., 2005). These dynamics could allow these regions to influence the behavior of lower-order circuitry (Ebitz and Moore, 2017), perhaps via amplifying the information available to the prefrontal cortex (Wang, 2008). Disrupting these dynamics, then, could have a range of psychological effects, which might be unified if thought of as randomizing behavior with respect to information or policies held in the prefrontal cortex.

On the surface, the link between lapses and perseverative errors that we report here may appear to conflict with previous views of errors in similar tasks as reflecting separate and dissociable cognitive processes. Many modern theories of flexibility view perseveration as measuring the (in)ability to inhibit a previous rule and lapses as measuring the (in)ability to either maintain a rule or to inhibit distraction from irrelevant options (Barceló, 1999; Barceló and Knight, 2002; Block et al., 2007; Floresco et al., 2006, 2009; Ragozzino, 2007). The present results can be reconciled with these theories if increasing depth of a rule makes it both easier to maintain and harder to inhibit. Increasing the depth of a rule could also decrease distraction, either by regulating the frequency of exploration or by regulating the strength of rule processes that otherwise outcompete distraction. There is precedent for the view that internal states linked to exploration (Jepma and Nieuwenhuis, 2011) also predict increased distraction (Ebitz and Platt,

429 2015; Mather and Sutherland, 2011). Moreover, tonic exploration almost certainly cannot  
430 explain all errors of task performance and it remains likely that increases in the number of lapses  
431 following other perturbations arise from changes in other cognitive processes (Barceló, 1999;  
432 Barceló and Knight, 2002; Block et al., 2007; Floresco et al., 2006, 2009; Ragozzino, 2007).

433

#### 434 **Relationship to previous views of cocaine**

435 The fact that cocaine administration increases perseverative responding is well-  
436 established (Bechara, 2005; Everitt and Robbins, 2005; Jentsch et al., 2002; Lucantonio et al.,  
437 2012; Porter et al., 2011; Robbins and Everitt, 1999). However, here cocaine simultaneously  
438 improved overall performance in a set-shifting task—the exact type of task in which  
439 perseveration should interfere with performance. At least one previous study reported that  
440 chronic cocaine use correlates with improved performance in a set shifting task (Hoff et al.,  
441 1996). Here, we replicate both results within the same animals in a causal study. We also  
442 reconcile both results with a simple formalism—a hidden Markov model in which cocaine  
443 deepened the attractor basins corresponding to rule states. Together, these results suggest that  
444 cocaine acts to stabilize rules, making it harder to break out from using a rule, either  
445 spontaneously or in response to feedback from the environment.

446 The perseverative effects of chronic cocaine use have previously been interpreted as a  
447 shift from goal-directed, action-outcome or model-based control systems to habitual, stimulus-  
448 response or model-free control systems (Bechara, 2005; Everitt and Robbins, 2005; Jentsch and  
449 Taylor, 1999; Jentsch et al., 2002; LeBlanc et al., 2013; Lucantonio et al., 2012; Robbins and  
450 Everitt, 1999; Robinson and Berridge, 1993). The present results support these views. In  
451 particular, these results support the influential hypothesis that cocaine shifts monkeys into a  
452 model-free decision-making regime, in which learning is slow and choices are habitual  
453 (Lucantonio et al., 2012). Although cocaine had no effect on the animals' sensitivity to rewards  
454 (there was no change in the difference in behavior following reward omission and delivery), it  
455 did increase the *hysteresis* of response policies—that is, the tendency to persist in a policy  
456 simply because you have been using it (Lau and Glimcher, 2005). This is consistent with  
457 previous observations that cocaine selectively interferes with learning when a previously-learned  
458 response must be overcome (Jentsch et al., 2002; Lucantonio et al., 2012; Porter et al., 2011) and  
459 observations that cocaine directly increases the probability of repeating responses (LeBlanc et  
460 al., 2013; Stout et al., 2004). We are not the first to note the link between exploratory noise and  
461 the balance between model-free and model-based decision-making (Dayan and Daw, 2008) and  
462 the present results suggest that regulating tonic exploratory noise may be the mechanism by  
463 which cocaine causes a shift towards model-free decision-making.

464

#### 465 **Basic insights into the mechanistic bases of flexibility**

466 The lawful relationship between lapses and perseverative errors was not an artificial  
467 consequence of cocaine exposure. Instead, cocaine shifted behavior along the axis of endogenous  
468 co-variability that already existed between these error types: tonic exploration was a meaningful  
469 parameter that was controlled by cocaine administration, not introduced by it. Thus, the  
470 neurobiological targets of cocaine exposure may be promising targets for understanding the  
471 neural basis of tonic exploration.

472 One important cortical target of chronic cocaine administration is the orbitofrontal cortex  
473 (OFC) (Lucantonio et al., 2012; Schoenbaum et al., 2004; Stalnaker et al., 2009): a region that is  
474 implicated in rule encoding (Baeg et al., 2009; Slezzer et al., 2016; Tsujimoto et al., 2011; Wallis

475 et al., 2001; Yamada et al., 2010). Orbitofrontal damage leads to a deficit in maintaining  
476 performance during stable, steady periods in the WCST (Stuss et al., 2000) and results in choice  
477 behavior that is consistent with an inability to learn or maintain rules (Walton et al., 2010). Of  
478 course, other cortical regions are also likely to contribute to regulating flexibility, particularly the  
479 anterior cingulate cortex (Ebitz and Hayden, 2016; Ebitz and Platt, 2015), and there are  
480 functional and structural difference in both the cingulate and the OFC in chronic cocaine  
481 exposure (Baeg et al., 2009; Franklin et al., 2002). Thus, these region are an important target for  
482 future studies of both cognitive flexibility and the effects of drugs of abuse.

483 Cocaine exposure also has profound effects on the brains' neuromodulatory landscape.  
484 Chronic cocaine alters the dopamine (DA) (Bradberry et al., 2000; Burchett and Bannon, 1997;  
485 Gifford and Johnson, 1992; Hurd et al., 1990; Pettit et al., 1990), norepineprine (NE) (Beveridge  
486 et al., 2005; Burchett and Bannon, 1997; Macey et al., 2003), acetylcholine (ACh) (Gifford and  
487 Johnson, 1992; Hurd et al., 1990), and serotonin (Burchett and Bannon, 1997) systems. ACh, DA  
488 and NE, in particular, have been previously implicated in regulating exploratory decision-making  
489 (Aston-Jones and Cohen, 2005; Doya, 2002; Yu and Dayan, 2005). Moreover, lesions of ACh  
490 interneurons in the dorsomedial striatum may be sufficient to produce a change in lapse rates and  
491 perseverative errors similar to those reported here (Aoki et al., 2015). The effects of cocaine  
492 here support hypotheses linking these neuromodulatory systems to exploration, but the  
493 hypothesis that cocaine regulates exploration via regulating these neuromodulatory systems will  
494 need to be tested empirically.

495

## 496 **Conclusions**

497 Why would exploratory noise influence behavior even when it has no strategic benefit?  
498 One possibility is that tonic exploration may have conferred such substantial benefits over  
499 evolutionary time that our brains evolved to maintain it even when it has no value in the moment.  
500 What benefits might these be? For one, up-regulating an existing stochastic noise process may  
501 simply be a more efficient use of metabolic resources than overcoming an embedded strategy *de*  
502 *novo*. For another, tonic exploratory noise could reduce the energetic and/or computational costs  
503 of deciding *when* to explore. In tonic exploration there is no need to calculate the value of  
504 exploration at each time step (Dayan and Daw, 2008).

505 Oddly, tonic exploration could also facilitate rule adherence by eliminating this  
506 calculation. In artificial intelligence literature, temporally-extended behavioral policies—known  
507 as “options”—can speed planning, reduce computational costs, and increase the capacity for  
508 complex and abstract goals (Sutton et al., 1999). Clearly there are parallels between options and  
509 cognitive rules (Miller and Cohen, 2001). It is notoriously difficult, however, for agents to learn  
510 to use options because it is always more valuable to re-evaluate the choice of option at each time  
511 step than to commit to one (Harb et al., 2017; Sutton et al., 1999). This is because commitment  
512 to an option imposes opportunity costs, even when the value of the alternatives is very low (Harb  
513 et al., 2017; Lloyd and Dayan, 2018). Tonic exploration would solve this problem because it  
514 ensures that alternatives to the current policy are occasionally sampled, but without the need to  
515 calculate the value of alternatives or indeed the need to represent the opportunity cost of  
516 extended commitment. Moreover, allowing agents to only probabilistically commit to a rule  
517 lowers the opportunity cost of commitment (Lloyd and Dayan, 2018). Thus, tonic exploratory  
518 noise may be an important part of how we evolved the ability to apply rules, as well as an  
519 intrinsic part of how we apply rules today.

520

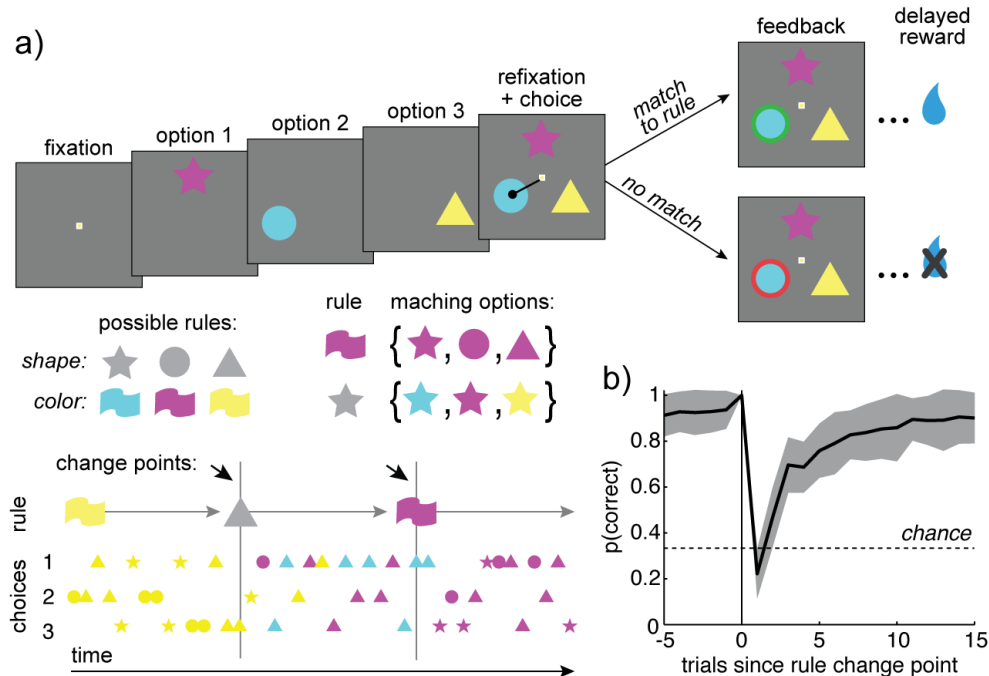

521  
522  
523  
524  
525  
526  
527  
528  
529  
530  
531  
532

**Figure 1. Task design and baseline behavior.** A) The CCST task. Three options, which differed in both shape and color were sequentially presented. Choosing an option that matched the rewarded rule produced a green outline around the chosen option and a reward. Choosing either of the other two options produced a red outline and no reward. Middle row, left: Rules could be any of the three shapes or any of the three colors. Right: The options that matched a rule were the set of stimuli that shared the rule's feature. Bottom: After the monkeys achieved 15 correct choices, the rewarded rule changed, which forced the monkeys to search for the new rule. B) Percent correct as a function of trials before and after rule changes. The 0<sup>th</sup> trial is the last trial before the rule changed. Gray shading +/- STD.

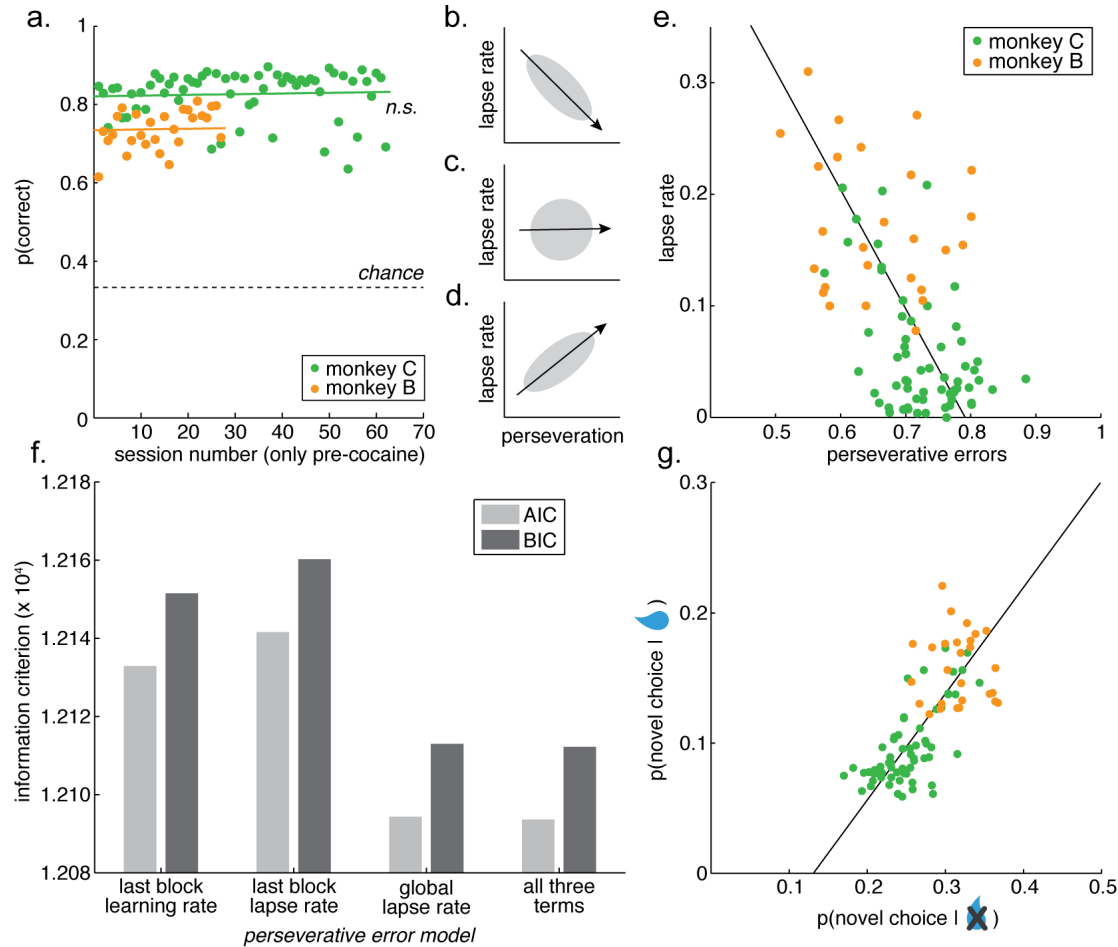

533  
534  
535  
536  
537  
538  
539  
540  
541  
542  
543  
544  
545  
546  
547  
548

**Figure 2: Behavior in baseline sessions.** A) Percent correct as a function of session-number in the baseline sessions, plotted separately for monkey C (green dots) and monkey B (orange). Lines are GLM fits for each monkey (Results). n.s. = not significant. B-D) Cartoon depicting the possible relationships between lapse rates and perseverative errors under different hypotheses. B) Some spontaneous lapses are caused by the same process that facilitates learning and reduces perseveration at change points. C) Lapses and perseveration are caused by different underlying error processes. D) Lapses and perseveration are both caused by a common error process, such as disengagement. E) The observed relationship between lapses in the 10 trials preceding change points and perseverative errors in the 5 trials after change points. F) Model comparison to determine whether perseverative errors are more closely related to the rate of learning or lapse rate in the last block or to the global lapse rate in that session. G) The correlation between the likelihood of novel choices (matching neither the last color nor last shape), given reward delivery and omission. Best fit lines = ordinary least squares.

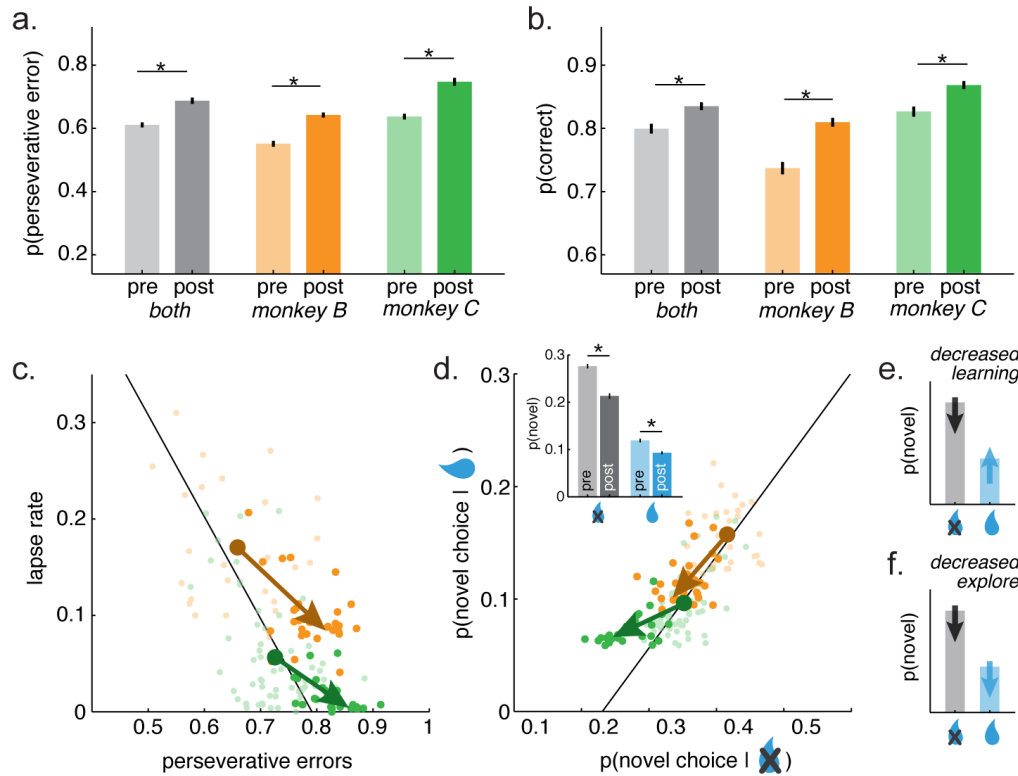

549  
550

551 **Figure 3: Changes in CSST behavior after cocaine administration.** A) The probability of  
552 perseverative errors before and after cocaine treatment (before = light, after = dark), plotted  
553 together for both monkeys (gray) as well as separately for monkey B (orange bars) and monkey  
554 C (green). Error bars +/- SEM throughout and \*  $p < 0.05$ , two-sample t-test. B) Same as A, for  
555 the percent of total correct trials in the pre- and post-cocaine sessions. C) Cocaine's effects on  
556 the relationship between spontaneous lapses and perseverative errors. Same as 2E, but now  
557 illustrating post-cocaine sessions (dark) and pre-cocaine sessions (light). The vectors reflect the  
558 shift in the mean with cocaine for monkey B (orange) and monkey C (green). D) Cocaine's  
559 effects on the relationship between novel choices after reward delivery (ordinate) and omission  
560 (abscissa). Same as 2G, but with the conventions of 3C. Inset) Change in novel choice  
561 probability, plotted separately for reward omission (gray) and delivery (blue). Pre-cocaine =  
562 light, post cocaine = dark. E) An illustration of the hypothesis that cocaine decreases learning  
563 rates. We would have expected to see a decrease in the difference between novel choices  
564 following reward delivery and reward omission in D, inset. F) Same as E, for the hypothesis that  
565 cocaine decreases exploration, in which case it would reduce all novel choices, without regard to  
566 previous reward outcome.

567



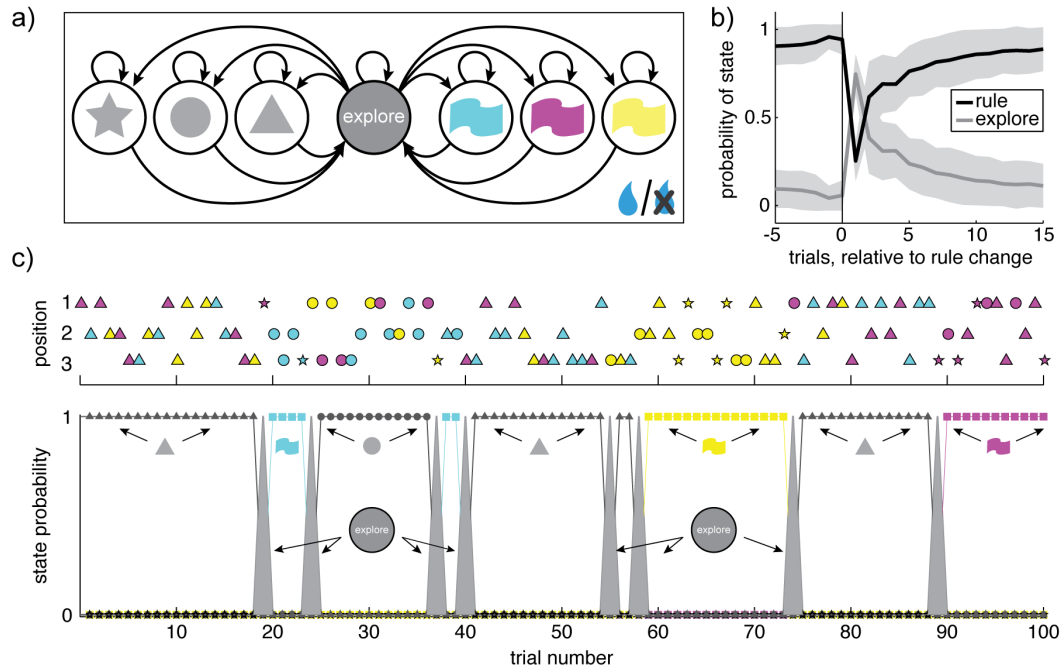

568  
569  
570  
571  
572  
573  
574  
575  
576  
577  
578  
579  
580  
581  
582  
583

**Figure 4: Hidden Markov model (HMM) design and fit to behavior.** A) The structure of the HMM, with one latent state for each possible rule, plus one latent “explore state”. Emissions (not shown) match the rule in the rule states, and are randomly allocated during the explore state. The box around the model indicates that this model has multiple “plates”, which depend on the reward of the previous trial (bottom right). That is, each path (transition probability between states) depends on whether the animal was or was not rewarded on the previous trial. B) The posterior probability of explore states and any of the rule states ( $1-p(\text{search})$ ) is illustrated as a function of trials relative to change points in the rewarded rule. Shading:  $\pm$  STD. C) Top: A sequence of 300 chosen options, separated vertically by whether the chosen option was in location 1, 2, or 3. Bottom, the state probabilities from a fitted HMM. Colored lines with colored boxes correspond to the color-rule states (blue, yellow, and magenta). Black lines with black shape icons correspond to shape-rule states (triangle, circle, square). The gray shaded line corresponds to the explore state probability.

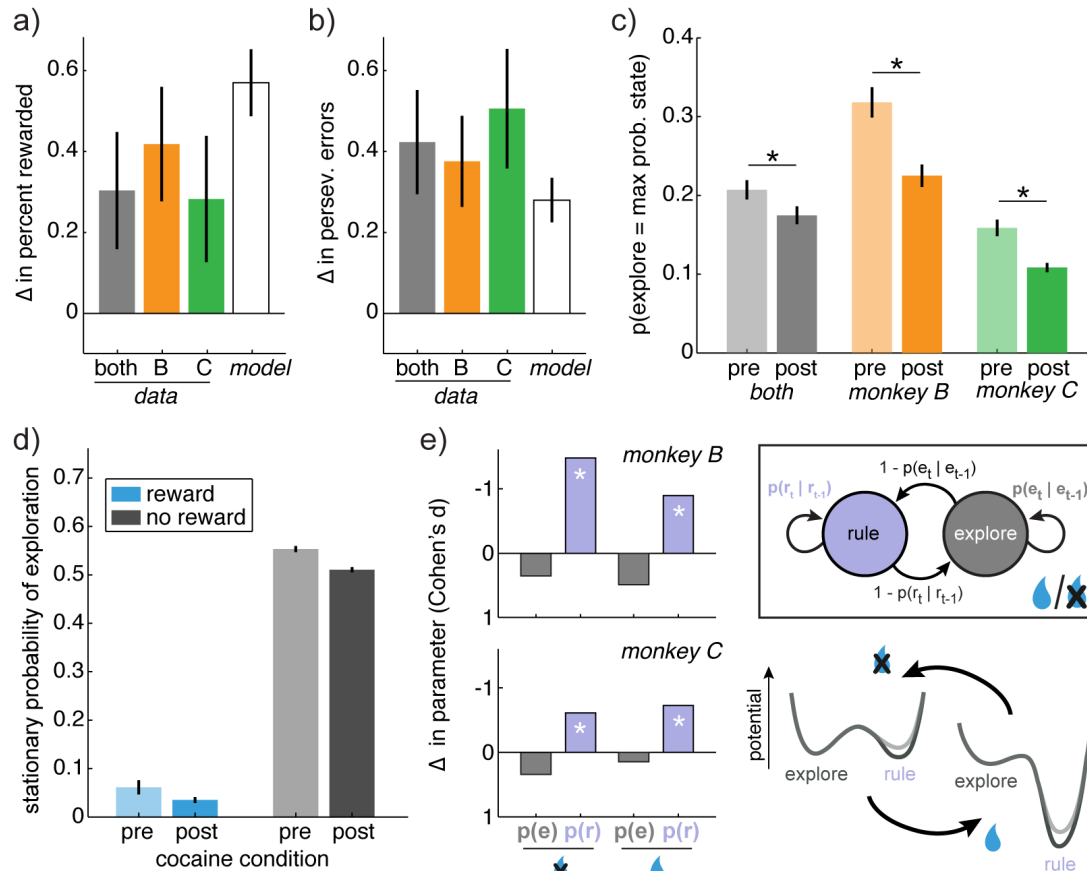

584  
585  
586  
587  
588  
589  
590  
591  
592  
593  
594  
595  
596  
597  
598  
599  
600  
601  
602  
603  
604  
605  
606

**Figure 5: HMM predictions and effects of cocaine on model behavior.** A) The increase in the probability correct after cocaine. Plotted separately for both monkeys together (gray bar), monkey B (orange) and monkey C (green), next to the increase in probability correct in simulated data from the model (white bar). Bars: Satterthwaite approximation of the  $\pm$  99 CI. B) Same as A, for change in perseverative errors. C) The probability that exploration was identified as the most probable cause of each choice, before and after cocaine. Gray=both monkeys together, orange=monkey B, green=monkey C. Bars  $\pm$  SEM. D) The stationary probability of the explore state, given the outcome of the previous trial (rewarded=blue, not rewarded=gray) and the cocaine condition (pre=before cocaine, post=after). E) Effect of cocaine on the the 4 free parameters in the model (top left). Change in parameters (Cohen's d, post-cocaine minus baseline) in monkey B (top) and monkey C (bottom). \*  $p < 0.05$ , t-test (see Table 1). Note that the slight decrease in the probability of staying in exploration was likely due to practice (see Results). Bottom right) A cartoon illustrating the effect of cocaine on model parameters (see Table 1) in terms of an attractor landscape. Here, exploration and rule adherence correspond to some local minima in a behavioral landscape, across which the monkeys move stochastically. Reward outcomes act to shift the baseline landscape (light line) from strongly favoring rule adherence following reward delivery (left) to a slight preference for exploration following reward omission (right; compare to panel D). Cocaine (dark line) globally increases the duration of rule-states, which suggests that it specifically deepens the attractor basin corresponding to rules, regardless of reward outcome.

607

| Parameter |                  | Monkey B      |                        | Monkey C      |                        |
|-----------|------------------|---------------|------------------------|---------------|------------------------|
|           |                  | Baseline      | Post-cocaine           | Baseline      | Post-cocaine           |
| Reward    | $p(r_t r_{t-1})$ | 0.978 (0.008) | <b>0.984 (0.006)**</b> | 0.995 (0.005) | <b>0.998 (0.002)**</b> |
|           | $p(e_t e_{t-1})$ | 0.73 (0.17)   | 0.64 (0.21)            | 0.30 (0.30)   | 0.25 (0.25)            |
| No reward | $p(r_t r_{t-1})$ | 0.02 (0.07)   | <b>0.19 (0.14)***</b>  | 0.04 (0.11)   | <b>0.11 (0.12)*</b>    |
|           | $p(e_t e_{t-1})$ | 0.28 (0.16)   | 0.22 (0.17)            | 0.18 (0.14)   | 0.14 (0.12)            |

608

609

610

611

612

613

614

**Table 1: Effects of cocaine on model parameters.** Mean parameter estimate (standard deviation) across all models.  $p(e_t)$  = probability of exploration.  $p(r_t)$  = probability of rule. Bold: significant change in post-cocaine sessions, relative to baseline within each monkey: \*  $p < 0.05$ , \*\*  $p < 0.005$ , \*\*\*  $p < 0.0001$ , t-test (see Results for test statistics).

## 615 **Methods.**

616

617 *General surgical procedures.* All animal procedures were approved by the University  
618 Committee on Animal Resources at the University of Rochester and were conducted in  
619 accordance with the Public Health Service's Guide for the Care and Use of Animals. Two male  
620 rhesus macaques (*Macaca mulatta*) served as subjects. The animals had previously been  
621 implanted with small prosthetics for holding the head (Christ Instruments), which allowed us to  
622 monitor eye position and use this as the response modality. These procedures have been  
623 described previously (Strait et al., 2014). To allow for chronic cocaine self-administration, we  
624 also implanted a subcutaneous vascular access port (VAP) in these animals (Access  
625 Technologies, Skokie, IL, USA), which was connected via an internal catheter to the femoral  
626 vein. Additional details of the VAP implantation procedure have been reported previously  
627 (Bradberry et al., 2000; Wojnicki et al., 1994). The VAP allowed monkeys to self-administer  
628 cocaine daily, and obviated the need for chemical or physical restraint, which might have  
629 unintended consequences for behavior. Animals received appropriate analgesics and antibiotics  
630 after all procedures, per direction of University of Rochester veterinarians. The animals were  
631 habituated to laboratory conditions and trained to perform oculomotor tasks for liquid reward  
632 before training on the conceptual set shifting task (CCST) began. Both animals participated in  
633 laboratory tasks for at least two years before the present experiment.

634

635 *Self-administration protocol.* The monkeys sat in a primate chair placed in a behavioral  
636 chamber with a touchscreen (ELO Touch Systems, Menlo Park, CA, USA). Syringe Pump Pro  
637 software (Version 1.6, Gawler, South Australia) controlled and monitored a syringe pump (Cole  
638 Parmer, Vernon Hills, IL, USA), which delivered cocaine into the monkeys' VAP. Monkeys  
639 pressed a centrally located visual cue on the touchscreen to obtain venous cocaine injections  
640 (cocaine provided by National Institutes of Drug Abuse, Bethesda, MD, USA), delivered in a 5  
641 mg/ml solution at a rate of 0.15 ml/s. Monkeys were acclimated to cocaine self-administration  
642 across ten days of training, during which the response requirement and dose increased from 3  
643 responses/reward (FR3) and 0.1 mg/kg (0.8 mg/kg of cocaine daily) to 30 responses/reward  
644 (FR30) and 0.5 mg/kg (4 mg/kg of cocaine daily). Monkeys were given 3 hours to complete  
645 infusions each day (in practice, monkeys typically completed the all 8 infusions within 1-2  
646 hours). Monkeys self-administered cocaine 5 days a week.

647

648 *Behavioral task.* Specific details of this task have been reported previously (Sleezer and  
649 Hayden, 2016; Sleezer et al., 2016, 2017; Yoo et al., 2018). Briefly, the present task was a  
650 version of the CSST: an analogue of the WCST that was developed for use in nonhuman  
651 primates (Moore et al., 2005). Task stimuli are similar to those used in the human WCST, with  
652 two dimensions (color and shape) and six specific rules (three shapes: circle, star, and triangle;  
653 three colors: cyan, magenta, and yellow; figure 1A). Choosing a stimulus that matches the  
654 currently rewarded rule (i.e. any blue shape when the rule is blue; any color of star when the rule  
655 is star) results visual feedback indicating that the choice is correct (a green outline around the  
656 chosen stimulus) and, after a 500 ms delay, a juice reward. Choosing a stimulus that does not  
657 match the current rule results in visual feedback indicating that the choice is incorrect (a red  
658 outline), and no reward is delivered after the 500 ms delay.

659

660 The rewarded rule was fixed for each block of trials. At the start of each block, the  
rewarded rule was drawn randomly. Blocks lasted until monkeys achieved 15 correct responses

661 that matched the current rule. This meant that blocks lasted for a variable number of total trials  
662 (average = 22.5), determined by both how long it took monkeys to discover the correct objective  
663 rule and how effectively monkeys exploited the correct rule, once discovered. Block changes  
664 were uncued, although reward-omission for a previously rewarded option provided noiseless  
665 information that the reward contingencies had changed.

666 On each trial, three stimuli were presented asynchronously, with each stimulus presented  
667 at the top, bottom left, or bottom right of the screen. The color, shape, position, and order of  
668 stimuli were randomized. Stimuli were presented for 400 msec and were followed by a 600-msec  
669 blank period. (The blank period was omitted from Figure 1A because of space constraints).  
670 Monkeys were free to look at the stimuli as they appeared, and, though they were not required to  
671 do so, they typically did (Sleezer and Hayden, 2016). After the third stimulus presentation and  
672 blank period, all three stimuli reappeared simultaneously with an equidistant central fixation  
673 spot. When they were ready to make a decision, monkeys were required to fixate on the central  
674 spot for 100 msec and then indicate their choice by shifting gaze to one stimulus and maintaining  
675 fixation on it for 250 msec. If the monkeys broke fixation within 250 milliseconds, they could  
676 either again fixate the same option or could change their mind and choose a different option  
677 (although they seldom did so). Thus, the task allowed the monkeys ample time to deliberate over  
678 their options, come to a choice, and even change their mind, without penalty of error.

679  
680 *General data analysis techniques.* Data were analyzed with custom MATLAB scripts and  
681 functions. All t-tests were two-sample, two-sided tests, unless otherwise noted. All generalized  
682 linear models (GLMs) included a dummy-coded term to account for a main effect of monkey  
683 identity (1 for monkey B, 0 for monkey C) and were fit to session-averages, rather than  
684 individual trials. One session (1/147) was excluded from these analyses because one of its  
685 transmission matrices did not admit a stationary distribution. No data points were excluded for  
686 any other reason. Observation counts for each analysis are reported in figure legends and/or  
687 Results.

688  
689 *Differentiating the effects of cocaine treatment from practice.* Task performance reached  
690 stable levels in both monkeys before the baseline, pre-cocaine sessions began (figure 2A).  
691 Nevertheless, we were concerned that putative effects of cocaine self-administration might  
692 instead be trivial consequences of the increased experience with the task in the post-cocaine  
693 sessions. Any effect of cocaine treatment would produce a step change in behavior that was  
694 aligned to the start of cocaine administration. Conversely, the effects of practice would change  
695 gradually across sessions. Therefore, to determine whether individual behavioral effects were  
696 due to practice or cocaine, we fit the following GLM to the session-averaged behaviors of  
697 interest:

$$698 \text{behavior} = \beta_0 + \beta_1 \cdot tx + \beta_2 \cdot session + \beta_3 \cdot monkey + \eta$$

699  
700  
701 Where “tx” is a logical vector indicating whether the session was conducted before or  
702 after chronic cocaine self-administration (a step change term) and “session” was a vector of  
703 session number within the experiment for each monkey (a gradual ramping term). One additional  
704 term “monkey” accounted for the random effect of monkey identity, and the model included the  
705 standard intercept and noise terms ( $\beta_0$  and  $\eta$ , respectively). Thus,  $\beta_1$  captured any offset due to  
706 chronic cocaine administration, while  $\beta_2$  captured any effect of practice for each analysis.

707  
708  
709  
710  
711  
712  
713  
714  
715  
716  
717  
718  
719  
720  
721  
722  
723  
724  
725  
726  
727  
728

*Probability of novel choices:* Only 3 of the 9 possible stimuli (i.e. 9 combinations of 3 colors and 3 shapes) were available on each trial, so the likelihood of repeating choices that shared neither feature was constrained by the available options. Therefore, we calculated the monkeys' probability of choosing each number of feature repeats as the total number of times a certain number of features was repeated, divided by how many times it was possible to repeat that number of features. Both terms were calculated within session.

*Hidden Markov Model.* In the HMM framework, choices ( $y$ ) are “emissions” that are generated by an unobserved decision process that is in some latent, hidden state ( $z$ ). Latent states are defined by both the probability of each emission, given that the process is in that state, and by the probability of transitioning to or from each state to every other state. Straightforward extensions of this framework allow inputs, such as rewards, to influence state transitions (Bengio and Frasconi, 1995), in which case the latent states can be thought of as a kind of discretized value function.

The observation model for each hidden state is the probability choosing each option when the process that state. These emissions models differed across the two broad classes of states in the model—the explore states and rule states—based on the fact that there were two different dynamics in the choice behavior: one reflecting random choosing while exploring and one reflecting long staying durations due to persistent rules (Figures S1 and S2). Therefore, the observation model for any choice option  $n$  during explore states was:

$$p(x_t = n | z_t = search) = \frac{1}{N}$$

729  
730  
731  
732  
733

Where  $N$  is the number of stimuli that were presented (i.e.  $N=3$ ). During rules, the observation model was conditioned on a match between each stimulus and the current rule:

$$p(x_t = n | z_t = rule_i, n = rule_i) = 1$$

$$p(x_t = n | z_t = rule_i, n \neq rule_i) = 0$$

734  
735  
736  
737  
738

The latent states in this model are Markovian meaning that they are time-independent. They depend only on the most recent state ( $z_t$ ) and most recent reward outcome ( $u_t$ ):

$$P(z_t | z_{t-1}, u_{t-1}, y_{t-1}, \dots, z_1, u_1, y_1) = P(z_t | z_{t-1}, u_{t-1})$$

739  
740  
741  
742  
743  
744  
745  
746  
747  
748  
749

This means that the probabilities of each state transition are described by reward-dependent transmission matrix,  $A_k = \{a_{i,j}\}_k = P(z_t = j | z_{t-1} = i, u_{t-1} = k)$  where  $k \in \{\text{rewarded, not rewarded}\}$ . There were 7 possible states (6 rule states and 1 explore state) but parameters were tied across rule states such that each rule state had the same probability of beginning (from exploring) and of sustaining itself. Similarly, transitions out of explore were tied across rules, meaning that it was equally likely to start using any of the 6 rules after exploring. Because monkeys could not divine the new rule following a change point and instead had to explore to discover it, transitions between different rule states were not permitted. The model assumed that monkeys had to pass through explore in order to start using a new rule, even if only for a single trial. Thus, each plate

750 k of the transition matrix had only two parameters, meaning there were a total of 4 parameters in  
751 the reward-dependent model.

752 The model was fit via expectation-maximization using the Baum Welch algorithm  
753 (Bilmes, 1998; Murphy, 2012). This algorithm finds a (possibly local) maxima of the complete-  
754 data likelihood, which is based on the joint probability of the hidden state sequence  $Z$  and the  
755 sequence of observed choices  $Y$ , given the observed rewards  $U$ :

756

$$757 \mathcal{L}(\Theta|Y, Z, U) = P(Z, Y|U, \Theta)$$

758

759 The complete set of parameters  $\Theta$  includes the observation and transmission models, discussed  
760 already, as well as an initial distribution over states, typically denoted as  $\pi$ . Because monkeys  
761 had no knowledge of the correct rule at the first trial of the session, we assumed the monkeys  
762 began in the explore state. The algorithm was reinitialized with random seeds 100 times, and the  
763 model that maximized the observed (incomplete) data log likelihood was ultimately taken as the  
764 best for each session. The model was fit to individual sessions, except to generate simulated data,  
765 in which case one model was fit to all baseline sessions and a second to all post-cocaine sessions.  
766 To decode latent states from choices, we used the Viterbi algorithm to discover the most  
767 probable a posteriori sequence of latent states (Murphy, 2012).

768 To simulate data from the model, we created an environment that matched the monkeys'  
769 task (choices between 3 options with 2 non-overlapping features and a randomly selected  
770 rewarded rule that changed after 15 correct trials). We then probabilistically drew latent states  
771 and choice emissions as the model interacted with the environment. The only modification to the  
772 model for simulation was that the choice of rule state following an explore state was constrained  
773 to match one of the two features of the last choice, chosen at randomly.

774

775 *Stationary distribution.* To gain insight into how cocaine changed the likelihood of rule  
776 states following reward delivery and omission, we examined the stationary distributions of the  
777 model. The transmission matrix of a HMM is a system of stochastic equations describing  
778 probabilistic transitions between each state. That is, each entry of a transmission matrix reflects  
779 the probability that the monkeys would move from one state (e.g. exploring) to another (e.g.  
780 using a rule) at each moment in time. In this HMM, there were two transmission matrices, one  
781 describing the dynamics after reward delivery and one describing the dynamics after reward  
782 omission. Moreover, because the parameters for all the rule states were tied, each transition  
783 matrix effectively had two states—an explore state and a generic rule-state that described the  
784 dynamics of all rule states. Each of these transition matrices ( $A_k$ ) describes how the entire  
785 system—an entire probability distribution over explore and rule states—would evolve from time  
786 point to time point given the outcome of the previous trial,  $k$ . You can observe how these  
787 dynamics would change any probability distribution over states  $\pi$  by applying the dynamics to  
788 this distribution:

789

$$790 \pi_{t+1} = \pi_t A_k$$

791

792 Over many iterations of these dynamics, ergodic systems will reach a point where the state  
793 distributions are unchanged by continued application of the transmission matrix as the  
794 distribution of states reaches its equilibrium. That is, in these systems, there exists a stationary  
distribution,  $\pi^*$ , such that:

795  $\pi^* = \pi^* A_k$

796 If it exists, this distribution is a (normalized) left eigenvector of the transition matrix  $A_k$  with an  
797 eigenvalue of 1, so we solved for this eigenvector to determine the stationary distribution of each  
798  $A_k$ , if it had one. (Only one of the  $A_k$  matrices did not admit a stationary distribution, so this  
799 session was not included in analyses related to this measure.)

800

801 *Analyzing stationary distributions.* To determine how cocaine affected the relative depth  
802 of exploration and the generic rule state, we constructed a GLM. The model included terms to  
803 describe the effects of reward, cocaine, and the interaction between the two on the depth of  
804 exploration. This interaction allowed the model to describe a phasic, reward-dependent effect of  
805 cocaine on the depth of exploration, if it were present:

806

$$\text{depth} = \beta_0 + \beta_1(\text{rwd}) + \beta_2(\text{cocaine}) + \beta_3(\text{rwd} \times \text{cocaine}) + \dots$$
$$\beta_4(\text{monkey}) + \beta_5(\text{session})$$

807

808

809 The model thus accounted for any offset between monkeys (“monkey”, 1 for monkey B, 0 for  
810 monkey C) or practice effects (“session”). It also included terms to describe the effects of reward  
811 (“rwd”, 1 for reward delivery, 0 for omission), cocaine (“cocaine”, 1 for pre-cocaine baseline  
812 sessions, 0 for post-cocaine sessions), and the interaction between reward and cocaine. This  
813 allowed the model to describe a phasic, reward-dependent effect of cocaine on model dynamics  
814 or a tonic, reward-independent form of exploration.

815

816 *Comparing changes in probabilities.* We calculated log odds ratios to compare the  
817 magnitude of changes in probability when baseline probabilities differed. Because probabilities  
818 are bounded, they are necessarily nonlinear transformations of an unbounded latent process of  
819 interest. This means that a fixed change in an underlying linear process can produce very  
820 different magnitude changes in probability, depending on the baselines. For intuition, picture a  
821 logistic function—a typical nonlinear transformation used to covert linear observations into  
822 probabilities. The effect of an equivalent change in the x-axis on the y-axis is depends on the  
823 baseline position on the x-axis: an identical shift on the x-axis has a large effect on y when x  
824 starts close to the midpoint of the function, but a small effect on y when x starts close to either  
825 end. The logit transformation linearizes the relationship between different observed probabilities  
826 because it is the inverse of the the logistic function:

827

$$\text{logit}(p) = \text{logistic}^{-1} = \log\left(\frac{p}{1-p}\right)$$

828

829

830 The difference between log odds (also known as the log odds ratio) then provides us with a  
831 linearized measure of effect magnitude (less sensitive to differing baseline levels). It is:

832

$$\text{log}(\text{odds ratio}) = \text{logit}(p_1) - \text{logit}(p_2)$$

833

834



835 **References:**

836

837 Ambegaokar, V. (2017). Reasoning About Luck: Probability and Its Uses in Physics (Mineola,  
838 New York: Dover Publications).

839 Aoki, S., Liu, A.W., Zucca, A., Zucca, S., and Wickens, J.R. (2015). Role of Striatal Cholinergic  
840 Interneurons in Set-Shifting in the Rat. *J. Neurosci.* 35, 9424–9431.

841 Ardid, S., and Wang, X.-J. (2013). A Tweaking Principle for Executive Control: Neuronal  
842 Circuit Mechanism for Rule-Based Task Switching and Conflict Resolution. *J. Neurosci.* 33,  
843 19504–19517.

844 Aston-Jones, G., and Cohen, J.D. (2005). An integrative theory of locus coeruleus-  
845 norepinephrine function: adaptive gain and optimal performance. *Annu Rev Neurosci* 28, 403–  
846 450.

847 Baeg, E.H., Jackson, M.E., Jedema, H.P., and Bradberry, C.W. (2009). Orbitofrontal and anterior  
848 cingulate cortex neurons selectively process cocaine-associated environmental cues in the rhesus  
849 monkey. *J. Neurosci.* 29, 11619–11627.

850 Barceló, F. (1999). Electrophysiological evidence of two different types of error in the  
851 Wisconsin Card Sorting Test. *Neuroreport* 10, 1299–1303.

852 Barceló, F., and Knight, R.T. (2002). Both random and perseverative errors underlie WCST  
853 deficits in prefrontal patients. *Neuropsychologia* 40, 349–356.

854 Beatty, W.W., Katzung, V.M., Moreland, V.J., and Nixon, S.J. (1995). Neuropsychological  
855 performance of recently abstinent alcoholics and cocaine abusers. *Drug Alcohol Depend.* 37,  
856 247–253.

857 Bechara, A. (2005). Decision making, impulse control and loss of willpower to resist drugs: a  
858 neurocognitive perspective. *Nat. Neurosci.* 8, 1458.

859 Behrens, T.E.J., Woolrich, M.W., Walton, M.E., and Rushworth, M.F.S. (2007). Learning the  
860 value of information in an uncertain world. *Nat. Neurosci.* 10, 1214–1221.

861 Bengio, Y., and Frasconi, P. (1995). An input output HMM architecture. In *Advances in Neural*  
862 *Information Processing Systems*, pp. 427–434.

863 Berg, H.C., and Brown, D.A. (1972). Chemotaxis in *Escherichia coli* analysed by three-  
864 dimensional tracking. *Nature* 239, 500–504.

865 Beveridge, T.J., Smith, H.R., Nader, M.A., and Porrino, L.J. (2005). Effects of chronic cocaine  
866 self-administration on norepinephrine transporters in the nonhuman primate brain.  
867 *Psychopharmacology (Berl.)* 180, 781–788.

868 Bilmes, J.A. (1998). A gentle tutorial of the EM algorithm and its application to parameter  
869 estimation for Gaussian mixture and hidden Markov models. *Int. Comput. Sci. Inst.* 4, 126.

- 870 Block, A.E., Dhanji, H., Thompson-Tardif, S.F., and Floresco, S.B. (2007). Thalamic–Prefrontal  
871 Cortical–Ventral Striatal Circuitry Mediates Dissociable Components of Strategy Set Shifting.  
872 *Cereb. Cortex* *17*, 1625–1636.
- 873 Bradberry, C.W., Barrett-Larimore, R.L., Jatlow, P., and Rubino, S.R. (2000). Impact of self-  
874 administered cocaine and cocaine cues on extracellular dopamine in mesolimbic and  
875 sensorimotor striatum in rhesus monkeys. *J. Neurosci.* *20*, 3874–3883.
- 876 Brody, C.D., Romo, R., and Kepecs, A. (2003). Basic mechanisms for graded persistent activity:  
877 discrete attractors, continuous attractors, and dynamic representations. *Curr. Opin. Neurobiol.*  
878 *13*, 204–211.
- 879 Burchett, S.A., and Bannon, M.J. (1997). Serotonin, dopamine and norepinephrine transporter  
880 mRNAs: heterogeneity of distribution and response to cocaine administration. *Mol. Brain*  
881 *Res.* *49*, 95–102.
- 882 Chaudhuri, R., and Fiete, I. (2016). Computational principles of memory. *Nat. Neurosci.* *19*, 394.
- 883 Ciesielski, K.T., and Harris, R.J. (1997). Factors related to performance failure on executive  
884 tasks in autism. *Child Neuropsychol.* *3*, 1–12.
- 885 Colzato, L.S., Huizinga, M., and Hommel, B. (2009). Recreational cocaine polydrug use impairs  
886 cognitive flexibility but not working memory. *Psychopharmacology (Berl.)* *207*, 225.
- 887 Compte, A., Brunel, N., Goldman-Rakic, P.S., and Wang, X.-J. (2000). Synaptic mechanisms  
888 and network dynamics underlying spatial working memory in a cortical network model. *Cereb.*  
889 *Cortex* *10*, 910–923.
- 890 Daw, N.D., O’Doherty, J.P., Dayan, P., Seymour, B., and Dolan, R.J. (2006). Cortical substrates  
891 for exploratory decisions in humans. *Nature* *441*, 876–879.
- 892 Dayan, P., and Daw, N.D. (2008). Decision theory, reinforcement learning, and the brain. *Cogn.*  
893 *Affect. Behav. Neurosci.* *8*, 429–453.
- 894 Doya, K. (2002). Metalearning and neuromodulation. *Neural Netw.* *15*, 495–506.
- 895 Ebitz, R.B., and Hayden, B.Y. (2016). Dorsal anterior cingulate: a Rorschach test for cognitive  
896 neuroscience. *Nat. Neurosci.* *19*, 1278.
- 897 Ebitz, R.B., and Moore, T. (2017). Selective modulation of the pupil light reflex by  
898 microstimulation of prefrontal cortex. *J. Neurosci.* *37*, 5008–5018.
- 899 Ebitz, R.B., and Platt, M.L. (2015). Neuronal activity in primate dorsal anterior cingulate cortex  
900 signals task conflict and predicts adjustments in pupil-linked arousal. *Neuron* *85*, 628–640.
- 901 Ebitz, R.B., Albarran, E., and Moore, T. (2018). Exploration Disrupts Choice-Predictive Signals  
902 and Alters Dynamics in Prefrontal Cortex. *Neuron*.

- 903 Everitt, B.J., and Robbins, T.W. (2005). Neural systems of reinforcement for drug addiction:  
904 from actions to habits to compulsion. *Nat. Neurosci.* 8, 1481.
- 905 Floresco, S.B., Ghods-Sharifi, S., Vexelman, C., and Magyar, O. (2006). Dissociable roles for  
906 the nucleus accumbens core and shell in regulating set shifting. *J. Neurosci.* 26, 2449–2457.
- 907 Floresco, S.B., Zhang, Y., and Enomoto, T. (2009). Neural circuits subserving behavioral  
908 flexibility and their relevance to schizophrenia. *Behav. Brain Res.* 204, 396–409.
- 909 Franklin, T.R., Acton, P.D., Maldjian, J.A., Gray, J.D., Croft, J.R., Dackis, C.A., O'Brien, C.P.,  
910 and Childress, A.R. (2002). Decreased gray matter concentration in the insular, orbitofrontal,  
911 cingulate, and temporal cortices of cocaine patients. *Biol. Psychiatry* 51, 134–142.
- 912 Gifford, A.N., and Johnson, K.M. (1992). Effect of chronic cocaine treatment on D2 receptors  
913 regulating the release of dopamine and acetylcholine in the nucleus accumbens and striatum.  
914 *Pharmacol. Biochem. Behav.* 41, 841–846.
- 915 Hänggi, P., Talkner, P., and Borkovec, M. (1990). Reaction-rate theory: fifty years after  
916 Kramers. *Rev. Mod. Phys.* 62, 251.
- 917 Harb, J., Bacon, P.-L., Klissarov, M., and Precup, D. (2017). When waiting is not an option:  
918 Learning options with a deliberation cost. *ArXiv Prepr. ArXiv170904571*.
- 919 Heinrichs, R.W., and Zakzanis, K.K. (1998). Neurocognitive deficit in schizophrenia: a  
920 quantitative review of the evidence. *Neuropsychology* 12, 426.
- 921 Hoff, A.L., Riordan, H., Morris, L., Cestaro, V., Wieneke, M., Alpert, R., Wang, G.-J., and  
922 Volkow, N. (1996). Effects of crack cocaine on neurocognitive function. *Psychiatry Res.* 60,  
923 167–176.
- 924 Hurd, Y.L., Weiss, F., Koob, G., and Ungerstedt, U. (1990). The influence of cocaine self-  
925 administration on in vivo dopamine and acetylcholine neurotransmission in rat caudate-putamen.  
926 *Neurosci. Lett.* 109, 227–233.
- 927 Jentsch, J.D., and Taylor, J.R. (1999). Impulsivity resulting from frontostriatal dysfunction in  
928 drug abuse: implications for the control of behavior by reward-related stimuli.  
929 *Psychopharmacology (Berl.)* 146, 373–390.
- 930 Jentsch, J.D., Olausson, P., De La Garza II, R., and Taylor, J.R. (2002). Impairments of reversal  
931 learning and response perseveration after repeated, intermittent cocaine administrations to  
932 monkeys. *Neuropsychopharmacology* 26, 183–190.
- 933 Jepma, M., and Nieuwenhuis, S. (2011). Pupil diameter predicts changes in the exploration–  
934 exploitation trade-off: Evidence for the adaptive gain theory. *J. Cogn. Neurosci.* 23, 1587–1596.
- 935 Kaelbling, L.P., Littman, M.L., and Moore, A.W. (1996). Reinforcement learning: A survey. *J.*  
936 *Artif. Intell. Res.* 4, 237–285.

- 937 Kopec, C.D., Erlich, J.C., Brunton, B.W., Deisseroth, K., and Brody, C.D. (2015). Cortical and  
938 subcortical contributions to short-term memory for orienting movements. *Neuron* 88, 367–377.
- 939 Lau, B., and Glimcher, P.W. (2005). Dynamic response-by-response models of matching  
940 behavior in rhesus monkeys. *J. Exp. Anal. Behav.* 84, 555–579.
- 941 LeBlanc, K.H., Maidment, N.T., and Ostlund, S.B. (2013). Repeated cocaine exposure facilitates  
942 the expression of incentive motivation and induces habitual control in rats. *PLoS One* 8, e61355.
- 943 Li, N., Daie, K., Svoboda, K., and Druckmann, S. (2016). Robust neuronal dynamics in premotor  
944 cortex during motor planning. *Nature* 532, 459.
- 945 Lloyd, K., and Dayan, P. (2018). Interrupting behaviour: Minimizing decision costs via temporal  
946 commitment and low-level interrupts. *PLoS Comput. Biol.* 14, e1005916.
- 947 Lucantonio, F., Stalnaker, T.A., Shaham, Y., Niv, Y., and Schoenbaum, G. (2012). The impact of  
948 orbitofrontal dysfunction on cocaine addiction. *Nat. Neurosci.* 15, 358.
- 949 Macey, D.J., Smith, H.R., Nader, M.A., and Porrino, L.J. (2003). Chronic cocaine self-  
950 administration upregulates the norepinephrine transporter and alters functional activity in the bed  
951 nucleus of the stria terminalis of the rhesus monkey. *J. Neurosci.* 23, 12–16.
- 952 Machens, C.K., Romo, R., and Brody, C.D. (2005). Flexible control of mutual inhibition: a  
953 neural model of two-interval discrimination. *Science* 307, 1121–1124.
- 954 Mather, M., and Sutherland, M.R. (2011). Arousal-biased competition in perception and  
955 memory. *Perspect. Psychol. Sci. J. Assoc. Psychol. Sci.* 6, 114–133.
- 956 McVay, J.C., and Kane, M.J. (2009). Conducting the train of thought: working memory capacity,  
957 goal neglect, and mind wandering in an executive-control task. *J. Exp. Psychol. Learn. Mem.*  
958 *Cogn.* 35, 196.
- 959 Miller, E.K., and Cohen, J.D. (2001). An integrative theory of prefrontal cortex function. *Annu.*  
960 *Rev. Neurosci.* 24, 167–202.
- 961 Moore, T.L., Killiany, R.J., Herndon, J.G., Rosene, D.L., and Moss, M.B. (2005). A non-human  
962 primate test of abstraction and set shifting: An automated adaptation of the Wisconsin Card  
963 Sorting Test. *J. Neurosci. Methods* 146, 165–173.
- 964 Murphy, K. (2012). *Machine Learning: A Probabilistic Perspective* (MIT press Cambridge).
- 965 Nassar, M.R., Rumsey, K.M., Wilson, R.C., Parikh, K., Heasley, B., and Gold, J.I. (2012).  
966 Rational regulation of learning dynamics by pupil-linked arousal systems. *Nat. Neurosci.* 15,  
967 1040.
- 968 O'Reilly, J.X., Schüffelgen, U., Cuell, S.F., Behrens, T.E., Mars, R.B., and Rushworth, M.F.  
969 (2013). Dissociable effects of surprise and model update in parietal and anterior cingulate cortex.  
970 *Proc. Natl. Acad. Sci.* 110, E3660–E3669.

- 971 Pearson, J.M., Hayden, B.Y., Raghavachari, S., and Platt, M.L. (2009). Neurons in posterior  
972 cingulate cortex signal exploratory decisions in a dynamic multioption choice task. *Curr. Biol.*  
973 *CB 19*, 1532–1537.
- 974 Pettit, H.O., Pan, H.-T., Parsons, L.H., and Justice, J.B. (1990). Extracellular concentrations of  
975 cocaine and dopamine are enhanced during chronic cocaine administration. *J. Neurochem.* *55*,  
976 798–804.
- 977 van der Plas, E.A., Crone, E.A., van den Wildenberg, W.P., Tranel, D., and Bechara, A. (2009).  
978 Executive control deficits in substance-dependent individuals: a comparison of alcohol, cocaine,  
979 and methamphetamine and of men and women. *J. Clin. Exp. Neuropsychol.* *31*, 706–719.
- 980 Porter, J.N., Olsen, A.S., Gurnsey, K., Dugan, B.P., Jedema, H.P., and Bradberry, C.W. (2011).  
981 Chronic cocaine self-administration in rhesus monkeys: impact on associative learning, cognitive  
982 control, and working memory. *J. Neurosci.* *31*, 4926–4934.
- 983 Ragozzino, M.E. (2007). The Contribution of the Medial Prefrontal Cortex, Orbitofrontal Cortex,  
984 and Dorsomedial Striatum to Behavioral Flexibility. *Ann. N. Y. Acad. Sci.* *1121*, 355–375.
- 985 Reason, J. (1990). *Human Error* (Cambridge University Press).
- 986 Robbins, T.W., and Everitt, B.J. (1999). Drug addiction: bad habits add up. *Nature* *398*, 567.
- 987 Robinson, T.E., and Berridge, K.C. (1993). The neural basis of drug craving: an incentive-  
988 sensitization theory of addiction. *Brain Res. Rev.* *18*, 247–291.
- 989 Rougier, N.P., Noelle, D.C., Braver, T.S., Cohen, J.D., and O'Reilly, R.C. (2005). Prefrontal  
990 cortex and flexible cognitive control: Rules without symbols. *Proc. Natl. Acad. Sci. U. S. A.* *102*,  
991 7338–7343.
- 992 Schoenbaum, G., Saddoris, M.P., Ramus, S.J., Shaham, Y., and Setlow, B. (2004). Cocaine-  
993 experienced rats exhibit learning deficits in a task sensitive to orbitofrontal cortex lesions. *Eur. J.*  
994 *Neurosci.* *19*, 1997–2002.
- 995 Sleezer, B.J., and Hayden, B.Y. (2016). Differential contributions of ventral and dorsal striatum  
996 to early and late phases of cognitive set reconfiguration. *J. Cogn. Neurosci.* *28*, 1849–1864.
- 997 Sleezer, B.J., Castagno, M.D., and Hayden, B.Y. (2016). Rule encoding in orbitofrontal cortex  
998 and striatum guides selection. *J. Neurosci.* *36*, 11223–11237.
- 999 Sleezer, B.J., LoConte, G.A., Castagno, M.D., and Hayden, B.Y. (2017). Neuronal responses  
1000 support a role for orbitofrontal cortex in cognitive set reconfiguration. *Eur. J. Neurosci.* *45*, 940–  
1001 951.
- 1002 Stalnaker, T.A., Takahashi, Y., Roesch, M.R., and Schoenbaum, G. (2009). Neural substrates of  
1003 cognitive inflexibility after chronic cocaine exposure. *Neuropharmacology* *56*, 63–72.

- 1004 Stout, J.C., Busemeyer, J.R., Lin, A., Grant, S.J., and Bonson, K.R. (2004). Cognitive modeling  
1005 analysis of decision-making processes in cocaine abusers. *Psychon. Bull. Rev.* *11*, 742–747.
- 1006 Strait, C.E., Blanchard, T.C., and Hayden, B.Y. (2014). Reward value comparison via mutual  
1007 inhibition in ventromedial prefrontal cortex. *Neuron* *82*, 1357–1366.
- 1008 Stuss, D.T., Levine, B., Alexander, M.P., Hong, J., Palumbo, C., Hamer, L., Murphy, K.J., and  
1009 Izukawa, D. (2000). Wisconsin Card Sorting Test performance in patients with focal frontal and  
1010 posterior brain damage: effects of lesion location and test structure on separable cognitive  
1011 processes. *Neuropsychologia* *38*, 388–402.
- 1012 Sutton, R.S., and Barto, A.G. (1998). Reinforcement learning: An introduction (MIT press  
1013 Cambridge).
- 1014 Sutton, R.S., Precup, D., and Singh, S. (1999). Between MDPs and semi-MDPs: A framework  
1015 for temporal abstraction in reinforcement learning. *Artif. Intell.* *112*, 181–211.
- 1016 Tsujimoto, S., Genovesio, A., and Wise, S.P. (2011). Comparison of strategy signals in the  
1017 dorsolateral and orbital prefrontal cortex. *J. Neurosci.* *31*, 4583–4592.
- 1018 Turner, T.H., LaRowe, S., Horner, M.D., Herron, J., and Malcolm, R. (2009). Measures of  
1019 cognitive functioning as predictors of treatment outcome for cocaine dependence. *J. Subst.*  
1020 *Abuse Treat.* *37*, 328–334.
- 1021 Van der Linden, D., Frese, M., and Meijman, T.F. (2003). Mental fatigue and the control of  
1022 cognitive processes: effects on perseveration and planning. *Acta Psychol. (Amst.)* *113*, 45–65.
- 1023 Vanderschuren, L.J., and Everitt, B.J. (2004). Drug seeking becomes compulsive after prolonged  
1024 cocaine self-administration. *Science* *305*, 1017–1019.
- 1025 Wallis, J.D., Anderson, K.C., and Miller, E.K. (2001). Single neurons in prefrontal cortex encode  
1026 abstract rules. *Nature* *411*, 953.
- 1027 Walton, M.E., Behrens, T.E., Buckley, M.J., Rudebeck, P.H., and Rushworth, M.F. (2010).  
1028 Separable learning systems in the macaque brain and the role of orbitofrontal cortex in  
1029 contingent learning. *Neuron* *65*, 927–939.
- 1030 Wang, X.-J. (2002). Probabilistic decision making by slow reverberation in cortical circuits.  
1031 *Neuron* *36*, 955–968.
- 1032 Wang, X.-J. (2008). Decision making in recurrent neuronal circuits. *Neuron* *60*, 215–234.
- 1033 Weissman, D.H., Roberts, K.C., Visscher, K.M., and Woldorff, M.G. (2006). The neural bases of  
1034 momentary lapses in attention. *Nat. Neurosci.* *9*, 971.
- 1035 Wilson, R.C., Nassar, M.R., and Gold, J.I. (2010). Bayesian online learning of the hazard rate in  
1036 change-point problems. *Neural Comput.* *22*, 2452–2476.

- 1037 Wilson, R.C., Geana, A., White, J.M., Ludvig, E.A., and Cohen, J.D. (2014). Humans use  
1038 directed and random exploration to solve the explore-exploit dilemma. *J. Exp. Psychol. Gen.*  
1039 *143*, 2074–2081.
- 1040 Wimmer, K., Nykamp, D.Q., Constantinidis, C., and Compte, A. (2014). Bump attractor  
1041 dynamics in prefrontal cortex explains behavioral precision in spatial working memory. *Nat.*  
1042 *Neurosci.* *17*, 431.
- 1043 Woicik, P.A., Urban, C., Alia-Klein, N., Henry, A., Maloney, T., Telang, F., Wang, G.-J.,  
1044 Volkow, N.D., and Goldstein, R.Z. (2011). A pattern of perseveration in cocaine addiction may  
1045 reveal neurocognitive processes implicit in the Wisconsin Card Sorting Test. *Neuropsychologia*  
1046 *49*, 1660–1669.
- 1047 Wojnicki, F.H., Bacher, J.D., and Glowa, J.R. (1994). Use of subcutaneous vascular access ports  
1048 in rhesus monkeys. *Lab. Anim. Sci.* *44*, 491–494.
- 1049 Yamada, M., Pita, M. del C.R., Iijima, T., and Tsutsui, K.-I. (2010). Rule-dependent anticipatory  
1050 activity in prefrontal neurons. *Neurosci. Res.* *67*, 162–171.
- 1051 Yoo, S.B.M., Slezzer, B.J., and Hayden, B.Y. (2018). Robust encoding of spatial information in  
1052 orbitofrontal cortex and striatum. *J. Cogn. Neurosci.* 1–16.
- 1053 Yu, A., J., and Dayan, P. (2005). Uncertainty, neuromodulation, and attention. *Neuron* *46*, 681–  
1054 692.
- 1055

1056

1057 **Acknowledgements:**

1058

1059 The authors would like to thank Nicola Grissom and Habiba Azab for comments on the  
1060 manuscript, Daniel Takahashi for invaluable discussion, Marc Mancarella, Meghan Pesce, and  
1061 Giuliana Loconte for technical help and assistance with animal care and husbandry. Support  
1062 provided by the National Institute on Drug Abuse (R01-DA038106) and the Brain & Behavior  
1063 Research Foundation (NARSAD award to BYH).

1064

1065 **Author Contributions:**

1066

1067 BJS and BYH designed the behavioral experiment; BJS, BYH, HPJ and CWB designed the  
1068 cocaine protocol; HPJ and BJS performed surgeries; BJS collected the data with guidance from  
1069 BYH, HPJ, and CWB; BJS, BYH, and RBE formulated the hypotheses; RBE analyzed the data;  
1070 BYH secured funding; RBE drafted the manuscript, which all authors edited.

1071

1072 **Declaration of Interests:**

1073

1074 The authors declare no competing interests.

1075



1076 **Supplemental Figures and References.**

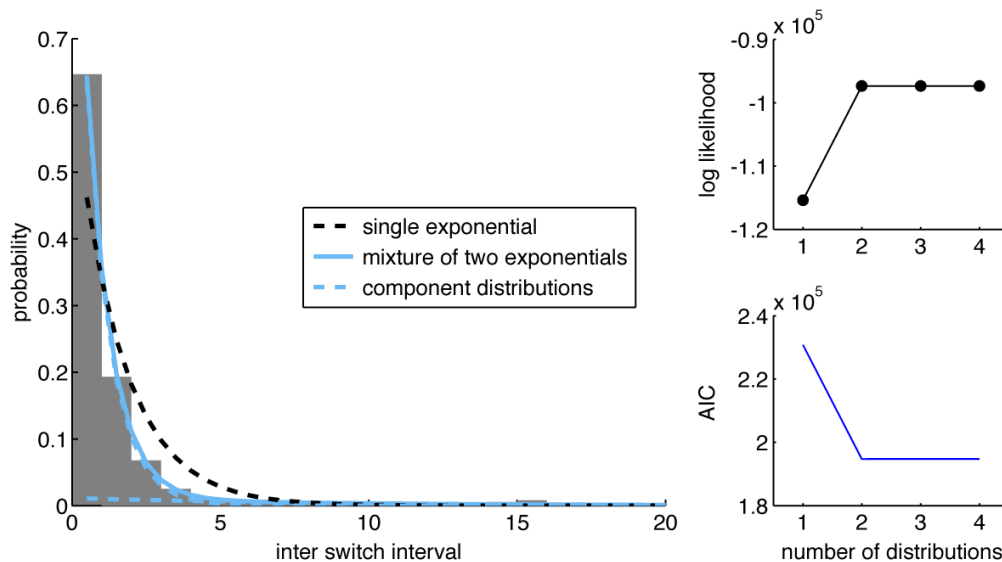

1077  
1078 **Supplemental Figure 1) Hidden Markov Model development (related to figures 4 and 5).** To  
1079 determine whether an HMM was an appropriate descriptive model for this dataset, we first asked  
1080 whether there were different behavioral dynamics that might correspond to using a rule and  
1081 exploring. One way to do this is to examine the distribution of runs of repeated choices within  
1082 some choice dimension (Ebitz, Albarran, & Moore, 2018). If monkeys are exploiting a rule, then  
1083 they would have to repeatedly choose options that are consistent with this rule. During a rule,  
1084 runs of repeated choices—or inter-switch intervals—would be long. However, exploration,  
1085 monkeys need to briefly sample the options to determine whether or not they are currently  
1086 rewarded. That is, during exploration runs of repeated choices should be very brief: on the order  
1087 of single trials.

1088 To the extent that choice runs end because of stochastic events (an assumption of the  
1089 HMM framework), inter-switch intervals will be exponentially distributed (Berg, 1993).  
1090 Moreover, if there are multiple latent regimes (such as exploring and rule-following), then we  
1091 would expect to see inter-switch intervals distributed as a mixture of exponential distributions,  
1092 because choice runs have a different probability of terminating in each latent regime. The  
1093 distribution of inter-switch intervals ( $n$  inter-switch intervals = 49,059) resembled an exponential  
1094 (**left**), but was better described by a mixture of two discrete exponential distributions (blue lines;  
1095 1 exponential: 1 parameter, log-likelihood = -142077.0, AIC = 284156.1, AIC weight < 0.0001,  
1096 BIC = 284165.6, BIC weight < 0.0001; (Burnham and Anderson, 2003)) than a single  
1097 distribution (black line; 2 exponential: 3 parameters, log-likelihood = -119773.2, AIC =  
1098 239552.4, AIC weight = 1, BIC = 239580.7, BIC weight = 1). Adding additional exponential  
1099 distributions did not improve model fit (**right**), suggesting that there were only two regimes (3  
1100 exponentials: 5 parameters, log-likelihood = -119773.2, AIC = 239556.4, AIC weight < 0.14,  
1101 BIC = 239603.7, BIC weight < 0.0001; 4 exponentials: 7 parameters, log-likelihood = -119773.2,  
1102 AIC = 239560.4, AIC weight < 0.02, BIC = 239626.6, BIC weight < 0.0001). The best-fitting  
1103 model, the two-exponential mixture had one long-latency component (half life = 9.0), consistent  
1104 with a persistent rule-following response mode. It also had one short latency component (half life  
1105 1.4; consistent with random choice between 3 options).

1106

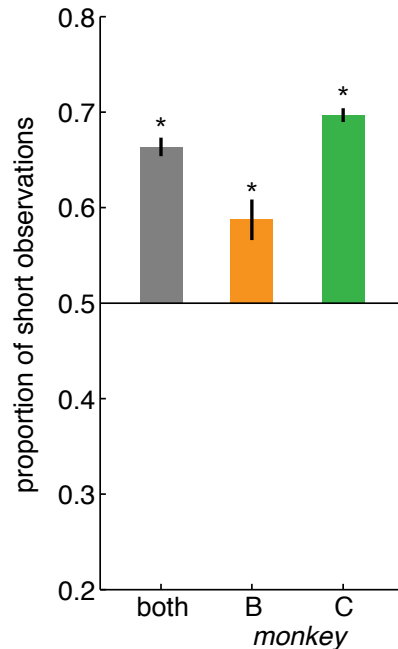

1107  
1108  
1109  
1110  
1111  
1112  
1113  
1114  
1115  
1116  
1117  
1118  
1119  
1120  
1121  
1122  
1123  
1124  
1125  
1126  
1127  
1128  
1129  
1130

**Supplemental Figure 2) Short choice runs occur more frequently than expected (related to figures 4 and 5).** Because rules only operated on either the color or shape of the option, we quantified the duration of inter-switch intervals independently within the color and shape domains (i.e. a magenta star choice followed by a magenta circle choice be counted as part of the same choice run in the color domain, but would part of different choice runs in the shape domains). This meant that choices would inevitably be randomized within one feature domain during repeated choices in the other domain. Thus, the existence of a mode with a short half-life is not sufficient evidence of short-latency search dynamics. However, if randomization in the other domain was the sole cause of short duration samples, then observations from the short sampling mode would occur exactly as frequently as observations from the persistent mode. However, short choice runs occurred more frequently than expected. To determine this, we calculated the expected time in each state as the product of the average run length in that state and the probability of being in that state. Then, we normalized the expected time in the short state by the sum of expected times in all states. That is, this measure would be at 0.5 if observations from the short state were equally as frequent, and greater than 0.5 if they were more frequent. The expected number of short state observations was significantly greater than 0.5 (both subjects, paired t-test,  $p < 0.0001$ ,  $t(88) = 17.02$ ; subject B:  $p < 0.0003$ ,  $t(26) = 4.18$ ; subject C,  $p < 0.0001$ ,  $t(61) = 27.6$ ), indicating that both subjects had more frequent short duration samples than would be expected if those short duration samples were merely caused by choices along a different dimension. Thus, both subjects exhibited strong evidence for a separate search state, in which they made short duration runs of choices to the different options.

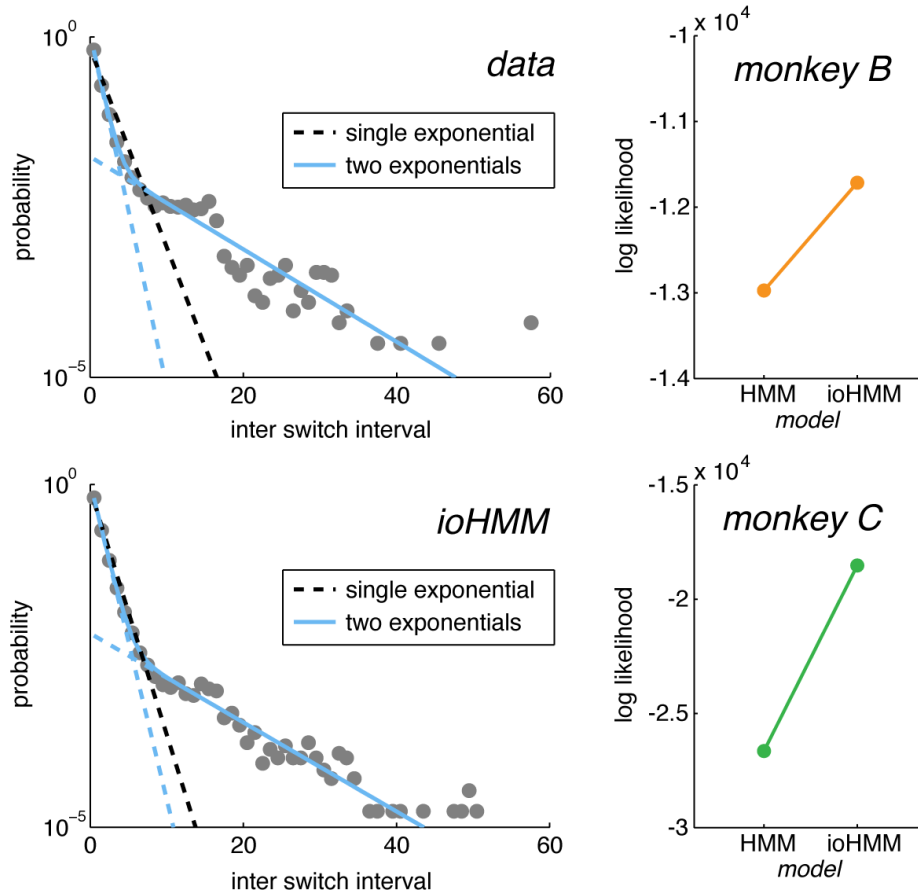

1131  
1132  
1133  
1134  
1135  
1136  
1137  
1138  
1139  
1140  
1141  
1142  
1143  
1144  
1145  
1146  
1147  
1148

**Supplemental Figure 3) An input-output HMM accounts for reward-dependent decisions (related to figures 4 and 5).** Inter-switch intervals were largely exponential—consistent with the Markovian assumptions of an HMM—and we observed different search and rule dynamics. However, it is important to note that in the log plot (**top left**), there were significant deviations from the predictions of simple exponential mixture model. These were likely due to the changes in reward contingencies that were triggered each time 15 correct trials were completed. To account for the obvious dependence on reward, we extended a simple 2 parameter HMM model to allow state transition probabilities to depend on previous reward outcomes (Bengio and Frasconi, 1995). Accounting for this reward dependence (4-parameter ioHMM) qualitatively reproduced these dynamics (**bottom left**) and quantitatively improved model fit in both monkeys (**right**; both monkeys: 2 parameter HMM, log-likelihood = -39614, 4 parameter ioHMM, log-likelihood = -30240, log-likelihood ratio test: statistic 18749,  $p < 0.0001$ ; monkey B: HMM, log-likelihood = -12973, ioHMM = -11714, log-likelihood ratio test: statistic = 2518.7  $p < 0.0001$ ; monkey C: HMM, log-likelihood = -26641, ioHMM = -18526, log-likelihood ratio test: statistic = 16230,  $p < 0.0001$ ).

1149 **Supplemental References**

1150

1151 Bengio, Y., and Frasconi, P. (1995). An input output HMM architecture. In *Advances in Neural*  
1152 *Information Processing Systems*, pp. 427–434.

1153 Berg, H.C. (1993). *Random walks in biology* (Princeton University Press).

1154 Burnham, K.P., and Anderson, D.R. (2003). *Model selection and multimodel inference: a*  
1155 *practical information-theoretic approach* (Springer Science & Business Media).
